# Supplementary material
Source: PubMed Central journal article supplement (PMC4542228)
Supplement: AEM.01297-15_zam999116581so1.pdf [file AEM.01297-15_zam999116581so1.pdf]

**Supplementary Materials for: Using amplicon sequencing to characterize and monitor bacterial diversity in drinking water distribution systems.**

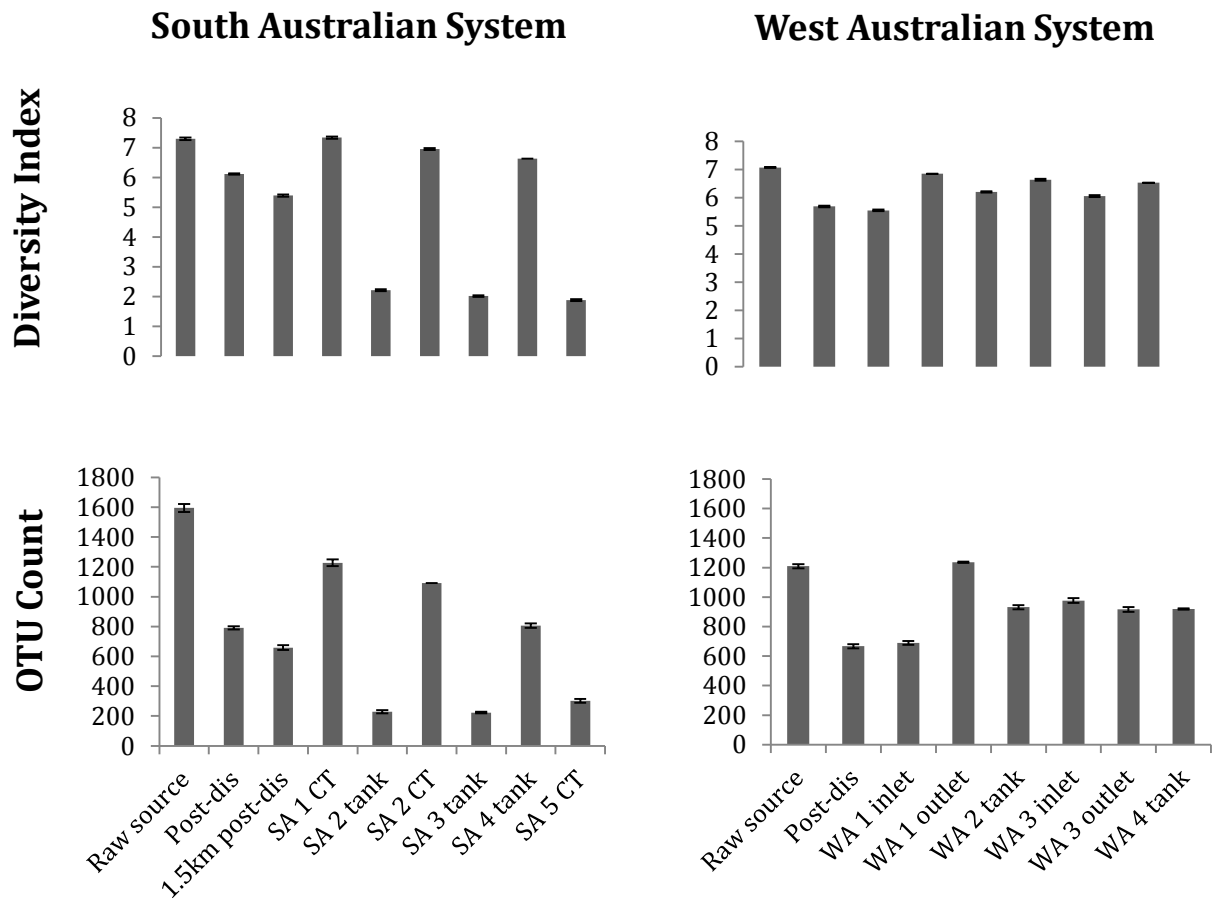

SM-1. Shannon Diversity index of a SA and WA DWDS samples, and the number of OTUs found in SA and WA DWDS samples.

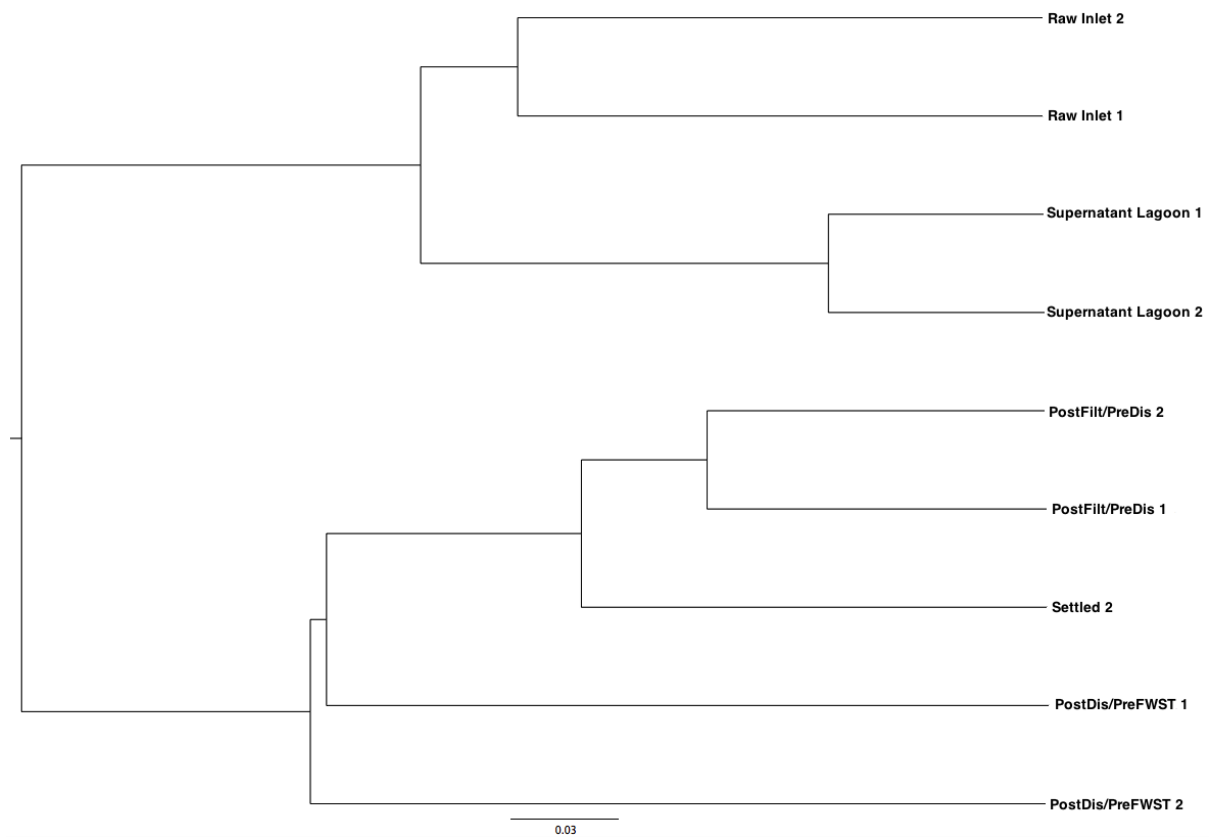

SM-2. Cluster plot of samples taken from SA WTP two-weeks apart (1 & 2). Sample names indicate different treatment stages within the SA WTP. Cluster dendrogram of sample similarity is based on jack-knifed ( $e = 10$ ) UNIFRAC bacterial community assemblage. \*one of the settled samples failed to amplify, possibly due to PCR inhibition caused by high amounts of chemicals and humics.

SM-3: Percentage of taxa identified per sample for the WA DWDS. Clustered at 97% and rarefied at 8904 sequences.

| Taxon                                                                      | Source Water | Post-dis | WA-1 Inlet | WA-1 Outlet | WA-2  | WA-3 Inlet | WA-3 Outlet | WA-4 CT |
|----------------------------------------------------------------------------|--------------|----------|------------|-------------|-------|------------|-------------|---------|
| Acidobacteria;Acidobacteria_Gp4;Gp4;Other;Other                            | 0.00%        | 0.00%    | 0.00%      | 0.00%       | 0.00% | 0.00%      | 0.01%       | 0.00%   |
| Acidobacteria;Acidobacteria_Gp6;Gp6;Other;Other                            | 0.29%        | 0.00%    | 0.00%      | 0.00%       | 0.01% | 0.00%      | 0.00%       | 0.00%   |
| Acidobacteria;Holophagae;Holophagales;Holophagaceae;Other                  | 0.00%        | 0.00%    | 0.00%      | 0.15%       | 0.10% | 0.14%      | 0.12%       | 0.00%   |
| Actinobacteria;Actinobacteria;Actinomycetales;Actinomycetaceae;Actinomyces | 0.00%        | 0.00%    | 0.00%      | 0.00%       | 0.02% | 0.00%      | 0.00%       | 0.00%   |

|                                                                                      |       |       |       |       |        |        |        |       |
|--------------------------------------------------------------------------------------|-------|-------|-------|-------|--------|--------|--------|-------|
| Actinobacteria;Actinobacteria;Actinomycetales;Corynebacteriaceae;Corynebacterium     | 0.00% | 0.09% | 0.00% | 0.00% | 0.00%  | 0.00%  | 0.00%  | 0.00% |
| Actinobacteria;Actinobacteria;Actinomycetales;Corynebacteriaceae;Other               | 0.00% | 0.00% | 0.01% | 0.00% | 0.00%  | 0.00%  | 0.00%  | 0.00% |
| Actinobacteria;Actinobacteria;Actinomycetales;Microbacteriaceae;Other                | 2.74% | 0.53% | 0.55% | 7.81% | 14.19% | 18.44% | 15.89% | 7.89% |
| Actinobacteria;Actinobacteria;Actinomycetales;Micrococcaceae;Kocuria                 | 0.00% | 0.00% | 0.00% | 0.05% | 0.00%  | 0.00%  | 0.00%  | 0.00% |
| Actinobacteria;Actinobacteria;Actinomycetales;Micrococcaceae;Other                   | 0.00% | 0.00% | 0.00% | 0.00% | 0.00%  | 0.00%  | 0.00%  | 0.01% |
| Actinobacteria;Actinobacteria;Actinomycetales;Micrococcaceae;Rothia                  | 0.00% | 0.00% | 0.00% | 0.00% | 0.00%  | 0.03%  | 0.00%  | 0.00% |
| Actinobacteria;Actinobacteria;Actinomycetales;Mycobacteriaceae;Mycobacterium         | 0.00% | 0.00% | 0.00% | 0.00% | 0.00%  | 0.00%  | 0.03%  | 0.64% |
| Actinobacteria;Actinobacteria;Actinomycetales;Other;Other                            | 0.63% | 0.42% | 0.58% | 3.62% | 1.30%  | 0.99%  | 1.28%  | 1.64% |
| Actinobacteria;Actinobacteria;Actinomycetales;Propionibacteriaceae;Other             | 0.00% | 0.00% | 0.10% | 0.08% | 0.01%  | 0.00%  | 0.01%  | 0.01% |
| Actinobacteria;Actinobacteria;Actinomycetales;Propionibacteriaceae;Propionibacterium | 0.00% | 0.00% | 0.42% | 0.00% | 0.02%  | 0.00%  | 0.00%  | 0.01% |
| Actinobacteria;Actinobacteria;Other;Other;Other                                      | 2.18% | 0.16% | 0.60% | 2.86% | 1.22%  | 2.42%  | 2.26%  | 1.07% |
| Bacteroidetes;Flavobacteria;Flavobacteriales;Corymorhphaceae;Fluviicola              | 0.03% | 0.00% | 0.00% | 0.08% | 0.06%  | 0.24%  | 0.10%  | 0.01% |
| Bacteroidetes;Flavobacteria;Flavobacteriales;Corymorhphaceae;Other                   | 0.00% | 0.00% | 0.00% | 0.03% | 0.00%  | 0.01%  | 0.01%  | 0.00% |
| Bacteroidetes;Flavobacteria;Flavobacteriales;Flavobacteriaceae;Capnocytophaga        | 0.00% | 0.00% | 0.00% | 0.03% | 0.00%  | 0.04%  | 0.00%  | 0.00% |
| Bacteroidetes;Flavobacteria;Flavobacteriales;Flavobacteriaceae;Chryseobacterium      | 0.00% | 0.00% | 0.00% | 0.00% | 0.00%  | 0.00%  | 0.00%  | 0.01% |
| Bacteroidetes;Flavobacteria;Flavobacteriales;Flavobacteriaceae;Elizabethkingia       | 0.00% | 0.00% | 0.00% | 0.00% | 0.00%  | 0.01%  | 0.00%  | 0.00% |
| Bacteroidetes;Flavobacteria;Flavobacteriales;Flavobacteriaceae;Flavobacterium        | 0.03% | 0.00% | 0.87% | 0.00% | 0.00%  | 0.00%  | 0.01%  | 0.00% |
| Bacteroidetes;Flavobacteria;Flavobacteriales;Flavobacteriaceae;Other                 | 0.02% | 0.00% | 0.02% | 0.03% | 0.02%  | 0.02%  | 0.02%  | 0.03% |
| Bacteroidetes;Flavobacteria;Flavobacteriales;Other;Other                             | 0.21% | 0.00% | 0.01% | 0.00% | 0.00%  | 0.05%  | 0.03%  | 0.00% |
| Bacteroidetes;Other;Other;Other;Other                                                | 1.29% | 0.13% | 0.14% | 1.68% | 0.52%  | 3.26%  | 1.78%  | 0.31% |
| Bacteroidetes;Sphingobacteria;Sphingobacteriales;Chitinophagaceae;Ferruginibacter    | 0.01% | 0.00% | 0.00% | 0.00% | 0.00%  | 0.00%  | 0.00%  | 0.00% |
| Bacteroidetes;Sphingobacteria;Sphingobacteriales;Chitinophagaceae;Other              | 0.39% | 0.00% | 0.00% | 0.00% | 0.04%  | 0.28%  | 0.23%  | 0.06% |
| Bacteroidetes;Sphingobacteria;Sphingobacteriales;Chitinophagaceae;Sediminibacterium  | 0.64% | 0.00% | 0.00% | 0.00% | 0.00%  | 0.00%  | 0.00%  | 0.00% |
| Bacteroidetes;Sphingobacteria;Sphingobacteriales;Cyclobacteriaceae;Algoriphagus      | 0.03% | 0.00% | 0.00% | 0.03% | 0.25%  | 0.77%  | 0.33%  | 0.09% |

|                                                                            |       |       |       |       |       |       |        |       |
|----------------------------------------------------------------------------|-------|-------|-------|-------|-------|-------|--------|-------|
| Bacteroidetes;Sphingobacteria;Sphingobacteriales;Cyclobacteriaceae;Other   | 0.27% | 0.00% | 0.00% | 0.00% | 0.01% | 0.02% | 0.05%  | 0.00% |
| Bacteroidetes;Sphingobacteria;Sphingobacteriales;Cytophagaceae;Cytophaga   | 0.00% | 0.00% | 0.00% | 0.00% | 0.00% | 0.00% | 0.01%  | 0.00% |
| Bacteroidetes;Sphingobacteria;Sphingobacteriales;Other;Other               | 0.37% | 0.00% | 0.26% | 0.40% | 0.21% | 0.24% | 0.27%  | 0.03% |
| Bacteroidetes;Sphingobacteria;Sphingobacteriales;Sphingobacteriaceae;Other | 0.00% | 0.00% | 0.00% | 0.03% | 0.00% | 0.00% | 0.00%  | 0.00% |
| Cyanobacteria;Cyanobacteria;Chloroplast;Bacillariophyta;Other              | 0.00% | 8.86% | 4.94% | 1.96% | 0.18% | 0.16% | 0.04%  | 0.00% |
| Cyanobacteria;Cyanobacteria;Chloroplast;Chlorophyta;Other                  | 0.00% | 0.02% | 0.11% | 0.00% | 0.00% | 0.00% | 0.02%  | 0.00% |
| Cyanobacteria;Cyanobacteria;Chloroplast;Cryptomonadaceae;Other             | 0.00% | 0.00% | 0.06% | 0.05% | 0.04% | 0.00% | 0.00%  | 0.00% |
| Cyanobacteria;Cyanobacteria;Chloroplast;Other;Other                        | 0.06% | 1.88% | 2.26% | 0.20% | 0.20% | 0.03% | 0.07%  | 0.03% |
| Cyanobacteria;Cyanobacteria;Chloroplast;Streptophyta;Other                 | 0.00% | 0.00% | 0.00% | 0.00% | 0.03% | 0.00% | 0.00%  | 0.00% |
| Cyanobacteria;Cyanobacteria;Family I;GpI;Other                             | 0.00% | 0.00% | 0.09% | 0.18% | 0.03% | 0.05% | 0.01%  | 0.00% |
| Cyanobacteria;Cyanobacteria;Family II;GpIIa;Other                          | 6.58% | 3.22% | 1.69% | 0.95% | 9.46% | 7.93% | 10.86% | 4.42% |
| Cyanobacteria;Cyanobacteria;Family II;Other;Other                          | 0.00% | 0.00% | 0.00% | 0.00% | 0.02% | 0.00% | 0.00%  | 0.00% |
| Cyanobacteria;Cyanobacteria;Family XI;GpXI;Other                           | 0.03% | 0.14% | 0.73% | 0.13% | 0.01% | 0.01% | 0.07%  | 0.03% |
| Cyanobacteria;Cyanobacteria;Other;Other;Other                              | 0.22% | 2.50% | 0.70% | 3.44% | 0.54% | 0.22% | 0.55%  | 1.53% |
| Deinococcus-Thermus;Deinococci;Thermales;Thermaceae;Meiothermus            | 0.00% | 0.00% | 0.00% | 0.00% | 0.00% | 0.06% | 0.00%  | 0.00% |
| Firmicutes;Bacilli;Bacillales;Bacillaceae;Other                            | 0.00% | 0.00% | 0.00% | 0.00% | 0.01% | 0.03% | 0.00%  | 0.00% |
| Firmicutes;Bacilli;Bacillales;Staphylococcaceae;Staphylococcus             | 0.00% | 0.00% | 0.01% | 0.00% | 0.00% | 0.00% | 0.00%  | 0.00% |
| Firmicutes;Bacilli;Lactobacillales;Carnobacteriaceae;Granulicatella        | 0.00% | 0.00% | 0.00% | 0.00% | 0.00% | 0.00% | 0.00%  | 0.01% |
| Firmicutes;Bacilli;Lactobacillales;Lactobacillaceae;Lactobacillus          | 0.00% | 0.00% | 0.00% | 0.00% | 0.00% | 0.00% | 0.00%  | 0.11% |
| Firmicutes;Bacilli;Lactobacillales;Other;Other                             | 0.02% | 0.00% | 0.23% | 0.00% | 0.00% | 0.00% | 0.00%  | 0.01% |
| Firmicutes;Bacilli;Lactobacillales;Streptococcaceae;Other                  | 0.03% | 0.00% | 0.01% | 0.00% | 0.00% | 0.00% | 0.00%  | 0.00% |
| Firmicutes;Bacilli;Lactobacillales;Streptococcaceae;Streptococcus          | 0.00% | 0.00% | 0.31% | 0.03% | 0.03% | 0.00% | 0.00%  | 0.00% |
| Firmicutes;Clostridia;Clostridiales;Clostridiaceae;Clostridium             | 0.00% | 0.00% | 0.00% | 0.00% | 0.00% | 0.01% | 0.00%  | 0.00% |
| Firmicutes;Clostridia;Clostridiales;Clostridiaceae;Other                   | 0.00% | 0.00% | 0.00% | 0.25% | 0.01% | 0.02% | 0.09%  | 0.00% |
| Firmicutes;Clostridia;Clostridiales;Incertae Sedis XI;Finegoldia           | 0.00% | 0.00% | 0.00% | 0.00% | 0.00% | 0.05% | 0.01%  | 0.00% |
| Firmicutes;Clostridia;Clostridiales;Incertae Sedis XI;Other                | 0.00% | 0.00% | 0.07% | 0.00% | 0.00% | 0.00% | 0.00%  | 0.00% |
| Firmicutes;Clostridia;Clostridiales;Lachnospirac                           | 0.00% | 0.00% | 0.00% | 0.03% | 0.01% | 0.01% | 0.01%  | 0.00% |

|                                                                                               |        |        |        |        |        |        |        |        |  |
|-----------------------------------------------------------------------------------------------|--------|--------|--------|--------|--------|--------|--------|--------|--|
| eae;Other                                                                                     |        |        |        |        |        |        |        |        |  |
| Firmicutes;Clostridia;Clostridiales;Other;Other                                               | 0.00%  | 0.00%  | 0.00%  | 0.75%  | 0.18%  | 0.61%  | 0.32%  | 0.14%  |  |
| Firmicutes;Clostridia;Clostridiales;Peptococcaeae;Other                                       | 0.00%  | 0.00%  | 0.00%  | 0.00%  | 0.01%  | 0.00%  | 0.00%  | 0.00%  |  |
| Firmicutes;Clostridia;Clostridiales;Ruminococcaeae;Acetivibrio                                | 0.00%  | 0.00%  | 0.00%  | 0.00%  | 0.01%  | 0.01%  | 0.00%  | 0.00%  |  |
| Firmicutes;Clostridia;Clostridiales;Ruminococcaeae;Other                                      | 0.00%  | 0.00%  | 0.00%  | 0.00%  | 0.01%  | 0.01%  | 0.00%  | 0.00%  |  |
| Firmicutes;Clostridia;Clostridiales;Veillonellaceae;Other                                     | 0.00%  | 0.16%  | 0.00%  | 0.00%  | 0.00%  | 0.00%  | 0.01%  | 0.00%  |  |
| Firmicutes;Clostridia;Clostridiales;Veillonellaceae;Veillonella                               | 0.00%  | 0.00%  | 0.00%  | 0.00%  | 0.00%  | 0.00%  | 0.00%  | 0.01%  |  |
| Firmicutes;Clostridia;Other;Other;Other                                                       | 0.01%  | 0.00%  | 0.00%  | 0.13%  | 0.03%  | 0.07%  | 0.04%  | 0.16%  |  |
| Firmicutes;Other;Other;Other;Other                                                            | 0.00%  | 0.00%  | 0.00%  | 0.00%  | 0.02%  | 0.09%  | 0.06%  | 0.06%  |  |
| Fusobacteria;Fusobacteria;Fusobacteriales;Fusobacteriaceae;Cetobacterium                      | 0.00%  | 0.00%  | 0.00%  | 0.00%  | 0.00%  | 0.02%  | 0.00%  | 0.00%  |  |
| Fusobacteria;Fusobacteria;Fusobacteriales;Leptotrichiaceae;Leptotrichia                       | 0.00%  | 0.00%  | 0.14%  | 0.03%  | 0.00%  | 0.00%  | 0.00%  | 0.00%  |  |
| Fusobacteria;Fusobacteria;Fusobacteriales;Other;Other                                         | 0.00%  | 0.00%  | 0.00%  | 0.00%  | 0.00%  | 0.01%  | 0.00%  | 0.00%  |  |
| Gemmatimonadetes;Gemmatimonadetes;Gemmatimonadales;Gemmatimonadaceae;Gemmatimonas             | 0.00%  | 0.00%  | 0.00%  | 0.05%  | 0.00%  | 0.00%  | 0.01%  | 0.00%  |  |
| Nitrospira;Nitrospira;Nitrospirales;Nitrospiraceae;Nitrospira                                 | 0.13%  | 0.00%  | 0.00%  | 0.08%  | 0.02%  | 0.01%  | 0.00%  | 0.63%  |  |
| Nitrospira;Nitrospira;Nitrospirales;Nitrospiraceae;Other                                      | 0.00%  | 0.00%  | 0.00%  | 0.00%  | 0.00%  | 0.00%  | 0.00%  | 0.01%  |  |
| Other;Other;Other;Other;Other                                                                 | 27.30% | 51.92% | 55.70% | 33.39% | 17.13% | 15.62% | 15.95% | 16.27% |  |
| Planctomycetes;Planctomycetacia;Planctomyceatales;Planctomycetaceae;Gemmata                   | 0.01%  | 0.04%  | 0.03%  | 0.03%  | 0.02%  | 0.00%  | 0.00%  | 0.00%  |  |
| Planctomycetes;Planctomycetacia;Planctomyceatales;Planctomycetaceae;Other                     | 0.22%  | 0.92%  | 0.70%  | 0.83%  | 0.26%  | 0.17%  | 0.14%  | 0.94%  |  |
| Planctomycetes;Planctomycetacia;Planctomyceatales;Planctomycetaceae;Planctomyces              | 0.01%  | 0.06%  | 0.09%  | 0.18%  | 0.02%  | 0.04%  | 0.01%  | 0.06%  |  |
| Planctomycetes;Planctomycetacia;Planctomyceatales;Planctomycetaceae;Zavarzinella              | 0.00%  | 0.01%  | 0.00%  | 0.00%  | 0.00%  | 0.00%  | 0.00%  | 0.00%  |  |
| Proteobacteria;Alphaproteobacteria;Alphaproteobacteria_incertae_sedis;Insolitispirillum;Other | 0.00%  | 0.00%  | 0.00%  | 0.03%  | 0.00%  | 0.00%  | 0.00%  | 0.00%  |  |
| Proteobacteria;Alphaproteobacteria;Alphaproteobacteria_incertae_sedis;Novispirillum;Other     | 0.00%  | 0.00%  | 0.00%  | 0.00%  | 0.02%  | 0.03%  | 0.00%  | 0.01%  |  |
| Proteobacteria;Alphaproteobacteria;Caulobacterales;Caulobacteraceae;Brevundimonas             | 0.04%  | 0.00%  | 0.04%  | 0.05%  | 0.03%  | 0.02%  | 0.01%  | 0.16%  |  |
| Proteobacteria;Alphaproteobacteria;Caulobacterales;Caulobacteraceae;Caulobacter               | 0.00%  | 0.00%  | 0.01%  | 0.00%  | 0.00%  | 0.00%  | 0.00%  | 0.01%  |  |
| Proteobacteria;Alphaproteobacteria;Caulobacterales;Caulobacteraceae;Other                     | 0.24%  | 0.00%  | 0.79%  | 0.18%  | 0.23%  | 0.48%  | 0.10%  | 0.57%  |  |
|                                                                                               | 0.00%  | 0.01%  | 0.01%  | 0.05%  | 0.01%  | 0.03%  | 0.04%  | 0.03%  |  |

|                                                                                      |        |       |       |       |        |        |        |        |
|--------------------------------------------------------------------------------------|--------|-------|-------|-------|--------|--------|--------|--------|
| Proteobacteria;Alphaproteobacteria;Caulobacterales;Caulobacteraceae;Phenylobacterium |        |       |       |       |        |        |        |        |
| Proteobacteria;Alphaproteobacteria;Caulobacterales;Hyphomonadaceae;Hyphomonas        | 0.00%  | 0.00% | 0.00% | 0.03% | 0.00%  | 0.01%  | 0.01%  | 0.00%  |
| Proteobacteria;Alphaproteobacteria;Caulobacterales;Other;Other                       | 0.01%  | 0.00% | 0.01% | 0.00% | 0.01%  | 0.01%  | 0.03%  | 0.01%  |
| Proteobacteria;Alphaproteobacteria;Other;Other;Other                                 | 5.22%  | 0.06% | 0.64% | 4.64% | 2.48%  | 4.42%  | 4.53%  | 19.08% |
| Proteobacteria;Alphaproteobacteria;Rhizobiales;Bradyrhizobiaceae;Bosea               | 0.00%  | 0.00% | 0.11% | 0.00% | 0.00%  | 0.03%  | 0.01%  | 1.08%  |
| Proteobacteria;Alphaproteobacteria;Rhizobiales;Bradyrhizobiaceae;Other               | 0.01%  | 0.00% | 0.00% | 0.00% | 0.00%  | 0.00%  | 0.00%  | 0.01%  |
| Proteobacteria;Alphaproteobacteria;Rhizobiales;Hyphomicrobiaceae;Filomicrobium       | 0.03%  | 0.00% | 0.00% | 0.00% | 0.00%  | 0.00%  | 0.00%  | 0.00%  |
| Proteobacteria;Alphaproteobacteria;Rhizobiales;Hyphomicrobiaceae;Other               | 1.71%  | 0.00% | 0.00% | 0.03% | 0.13%  | 0.44%  | 0.33%  | 0.33%  |
| Proteobacteria;Alphaproteobacteria;Rhizobiales;Methylocystaceae;Methylocystis        | 0.00%  | 0.01% | 0.12% | 0.00% | 0.01%  | 0.01%  | 0.00%  | 0.00%  |
| Proteobacteria;Alphaproteobacteria;Rhizobiales;Methylocystaceae;Other                | 0.00%  | 0.26% | 0.02% | 0.00% | 0.00%  | 0.00%  | 0.00%  | 0.00%  |
| Proteobacteria;Alphaproteobacteria;Rhizobiales;Other;Other                           | 0.13%  | 0.07% | 0.06% | 0.05% | 0.02%  | 0.18%  | 0.10%  | 0.21%  |
| Proteobacteria;Alphaproteobacteria;Rhizobiales;Phyllobacteriaceae;Mesorhizobium      | 0.00%  | 0.00% | 0.04% | 0.00% | 0.00%  | 0.00%  | 0.00%  | 0.00%  |
| Proteobacteria;Alphaproteobacteria;Rhizobiales;Phyllobacteriaceae;Other              | 0.00%  | 0.00% | 0.01% | 0.00% | 0.00%  | 0.00%  | 0.00%  | 0.00%  |
| Proteobacteria;Alphaproteobacteria;Rhodobacterales;Rhodobacteraceae;Other            | 0.02%  | 0.00% | 0.11% | 0.03% | 0.00%  | 0.02%  | 0.01%  | 0.03%  |
| Proteobacteria;Alphaproteobacteria;Rhodobacterales;Rhodobacteraceae;Rhodobacter      | 0.00%  | 0.00% | 0.00% | 0.00% | 0.00%  | 0.00%  | 0.00%  | 0.01%  |
| Proteobacteria;Alphaproteobacteria;Rhodospirillales;Acetobacteraceae;Craurococcus    | 0.01%  | 0.00% | 0.00% | 0.00% | 0.00%  | 0.00%  | 0.00%  | 0.00%  |
| Proteobacteria;Alphaproteobacteria;Rhodospirillales;Acetobacteraceae;Other           | 7.41%  | 0.00% | 0.04% | 0.83% | 1.06%  | 0.94%  | 1.25%  | 0.88%  |
| Proteobacteria;Alphaproteobacteria;Rhodospirillales;Acetobacteraceae;Roseomonas      | 0.00%  | 0.00% | 0.00% | 0.00% | 0.00%  | 0.01%  | 0.01%  | 0.00%  |
| Proteobacteria;Alphaproteobacteria;Rhodospirillales;Other;Other                      | 0.24%  | 0.01% | 0.02% | 0.08% | 0.04%  | 0.18%  | 0.01%  | 0.01%  |
| Proteobacteria;Alphaproteobacteria;Rhodospirillales;Rhodospirillaceae;Other          | 0.00%  | 0.86% | 3.27% | 0.18% | 0.09%  | 0.04%  | 0.00%  | 0.06%  |
| Proteobacteria;Alphaproteobacteria;Rhodospirillales;Rhodospirillaceae;Rhodocista     | 0.00%  | 0.00% | 0.01% | 0.00% | 0.00%  | 0.00%  | 0.00%  | 0.00%  |
| Proteobacteria;Alphaproteobacteria;Rickettsiales;Other;Other                         | 0.00%  | 0.00% | 0.00% | 0.25% | 0.02%  | 0.01%  | 0.00%  | 0.00%  |
| Proteobacteria;Alphaproteobacteria;Rickettsiales;SAR11;Pelagibacter                  | 15.27% | 0.01% | 0.27% | 3.57% | 33.37% | 24.33% | 28.68% | 4.14%  |
| Proteobacteria;Alphaproteobacteria;Sphingomonadales;Erythrobacteraceae;Croceicoccus  | 0.00%  | 0.00% | 0.00% | 0.00% | 0.00%  | 0.00%  | 0.01%  | 0.01%  |



|                                                                                             |       |       |       |       |       |       |       |       |
|---------------------------------------------------------------------------------------------|-------|-------|-------|-------|-------|-------|-------|-------|
| Proteobacteria;Betaproteobacteria;Neisseriales;Neisseriaceae;Other                          | 0.00% | 0.01% | 0.00% | 0.43% | 0.13% | 0.23% | 0.11% | 0.30% |
| Proteobacteria;Betaproteobacteria;Other;Other;Other                                         | 0.53% | 0.05% | 0.12% | 0.58% | 0.60% | 0.33% | 0.31% | 0.47% |
| Proteobacteria;Betaproteobacteria;Rhodocyclales;Rhodocyclaceae;Azonexus                     | 0.00% | 0.10% | 0.00% | 0.30% | 0.12% | 0.60% | 0.15% | 0.16% |
| Proteobacteria;Betaproteobacteria;Rhodocyclales;Rhodocyclaceae;Azospira                     | 0.00% | 0.00% | 0.00% | 0.13% | 0.03% | 0.11% | 0.03% | 0.03% |
| Proteobacteria;Betaproteobacteria;Rhodocyclales;Rhodocyclaceae;Denitratisona                | 0.00% | 0.00% | 0.00% | 0.00% | 0.00% | 0.03% | 0.03% | 0.00% |
| Proteobacteria;Betaproteobacteria;Rhodocyclales;Rhodocyclaceae;Other                        | 0.00% | 0.03% | 0.03% | 0.68% | 0.06% | 0.09% | 0.04% | 0.09% |
| Proteobacteria;Deltaproteobacteria;Bdellovibrionales;Bacteriovoraceae;Peredibacter          | 0.02% | 0.00% | 0.00% | 0.00% | 0.00% | 0.00% | 0.01% | 0.00% |
| Proteobacteria;Deltaproteobacteria;Bdellovibrionales;Bdellovibrionaceae;Bdellovibrio        | 0.04% | 0.00% | 0.00% | 0.00% | 0.01% | 0.00% | 0.00% | 0.00% |
| Proteobacteria;Deltaproteobacteria;Desulfobacteriales;Desulfobacteraceae;Other              | 0.00% | 0.00% | 0.00% | 0.00% | 0.00% | 0.01% | 0.00% | 0.00% |
| Proteobacteria;Deltaproteobacteria;Desulfovibrionales;Desulfovibrionaceae;Desulfovibrio     | 0.00% | 0.00% | 0.00% | 0.00% | 0.02% | 0.01% | 0.00% | 0.00% |
| Proteobacteria;Deltaproteobacteria;Desulfovibrionales;Other;Other                           | 0.00% | 0.00% | 0.00% | 0.00% | 0.00% | 0.00% | 0.00% | 0.03% |
| Proteobacteria;Deltaproteobacteria;Desulfurimonadales;Geobacteraceae;Geobacter              | 0.00% | 0.00% | 0.00% | 0.00% | 0.00% | 0.00% | 0.01% | 0.00% |
| Proteobacteria;Deltaproteobacteria;Desulfurimonadales;Other;Other                           | 0.00% | 0.00% | 0.00% | 0.00% | 0.00% | 0.00% | 0.01% | 0.00% |
| Proteobacteria;Deltaproteobacteria;Myxococcales;Kofleriaceae;Kofleria                       | 0.02% | 0.00% | 0.00% | 0.00% | 0.00% | 0.01% | 0.00% | 0.00% |
| Proteobacteria;Deltaproteobacteria;Myxococcales;Nannocystaceae;Nannocystis                  | 0.01% | 0.00% | 0.00% | 0.10% | 0.00% | 0.00% | 0.01% | 0.00% |
| Proteobacteria;Deltaproteobacteria;Myxococcales;Other;Other                                 | 0.07% | 0.25% | 0.00% | 0.03% | 0.00% | 0.01% | 0.03% | 0.04% |
| Proteobacteria;Deltaproteobacteria;Myxococcales;Phaselicystidaceae;Phaselicystis            | 0.01% | 0.03% | 0.00% | 0.03% | 0.00% | 0.00% | 0.00% | 0.00% |
| Proteobacteria;Deltaproteobacteria;Other;Other;Other                                        | 0.03% | 0.01% | 0.11% | 0.05% | 0.00% | 0.01% | 0.00% | 0.00% |
| Proteobacteria;Epsilonproteobacteria;Campylobacteriales;Campylobacteraceae;Arcobacter       | 0.00% | 0.00% | 0.00% | 0.00% | 0.01% | 0.06% | 0.01% | 0.00% |
| Proteobacteria;Epsilonproteobacteria;Campylobacteriales;Campylobacteraceae;Sulfurospirillum | 0.00% | 0.00% | 0.00% | 0.00% | 0.01% | 0.00% | 0.03% | 0.00% |
| Proteobacteria;Epsilonproteobacteria;Campylobacteriales;Helicobacteraceae;Other             | 0.00% | 0.00% | 0.00% | 0.00% | 0.01% | 0.00% | 0.00% | 0.00% |
| Proteobacteria;Epsilonproteobacteria;Campylobacteriales;Helicobacteraceae;Sulfuricurvum     | 0.00% | 0.00% | 0.00% | 0.05% | 0.00% | 0.00% | 0.03% | 0.00% |
| Proteobacteria;Epsilonproteobacteria;Campylobacteriales;Helicobacteraceae;Sulfurimonas      | 0.00% | 0.00% | 0.00% | 0.00% | 0.01% | 0.01% | 0.00% | 0.00% |



|                                                                                             |       |       |       |       |       |       |       |       |
|---------------------------------------------------------------------------------------------|-------|-------|-------|-------|-------|-------|-------|-------|
| Proteobacteria;Epsilonproteobacteria;Campylobacteriales;Other;Other                         | 0.02% | 0.00% | 0.00% | 0.00% | 0.00% | 0.00% | 0.00% | 0.00% |
| Proteobacteria;Gammaproteobacteria;Aeromonadales;Aeromonadaceae;Aeromonas                   | 0.00% | 0.00% | 0.28% | 0.05% | 0.00% | 0.03% | 0.07% | 0.11% |
| Proteobacteria;Gammaproteobacteria;Alteromonadales;Other;Other                              | 0.00% | 0.00% | 0.00% | 0.00% | 0.00% | 0.00% | 0.00% | 0.01% |
| Proteobacteria;Gammaproteobacteria;Enterobacterales;Enterobacteriaceae;Buttiauxella         | 0.00% | 0.00% | 0.00% | 0.00% | 0.00% | 0.02% | 0.00% | 0.00% |
| Proteobacteria;Gammaproteobacteria;Enterobacterales;Enterobacteriaceae;Escherichia/Shigella | 0.08% | 8.48% | 5.57% | 0.20% | 0.09% | 0.44% | 0.26% | 1.01% |
| Proteobacteria;Gammaproteobacteria;Enterobacterales;Enterobacteriaceae;Morganella           | 0.00% | 0.00% | 0.00% | 0.00% | 0.00% | 0.02% | 0.00% | 0.00% |
| Proteobacteria;Gammaproteobacteria;Enterobacterales;Enterobacteriaceae;Other                | 0.38% | 0.12% | 0.19% | 0.18% | 0.14% | 0.13% | 0.18% | 0.04% |
| Proteobacteria;Gammaproteobacteria;Enterobacterales;Enterobacteriaceae;Plesiomonas          | 0.00% | 0.01% | 0.00% | 0.03% | 0.01% | 0.02% | 0.01% | 0.14% |
| Proteobacteria;Gammaproteobacteria;Enterobacterales;Enterobacteriaceae;Serratia             | 1.32% | 0.00% | 0.00% | 0.00% | 0.03% | 0.09% | 0.00% | 0.04% |
| Proteobacteria;Gammaproteobacteria;Legionellales;Coxiellaceae;Aquicella                     | 0.04% | 0.00% | 0.00% | 0.00% | 0.01% | 0.00% | 0.00% | 0.00% |
| Proteobacteria;Gammaproteobacteria;Legionellales;Legionellaceae;Legionella                  | 0.02% | 0.02% | 0.00% | 0.00% | 0.00% | 0.02% | 0.03% | 0.06% |
| Proteobacteria;Gammaproteobacteria;Legionellales;Legionellaceae;Other                       | 0.34% | 0.36% | 0.01% | 0.03% | 0.00% | 0.01% | 0.03% | 0.07% |
| Proteobacteria;Gammaproteobacteria;Methylococcales;Methylococcaceae;Methylobacter           | 0.00% | 0.00% | 0.02% | 0.00% | 0.00% | 0.00% | 0.00% | 0.00% |
| Proteobacteria;Gammaproteobacteria;Methylococcales;Methylococcaceae;Methylomonas            | 0.00% | 0.00% | 0.01% | 0.00% | 0.00% | 0.01% | 0.00% | 0.00% |
| Proteobacteria;Gammaproteobacteria;Methylococcales;Methylococcaceae;Other                   | 0.03% | 0.00% | 0.15% | 0.00% | 0.01% | 0.02% | 0.01% | 0.00% |
| Proteobacteria;Gammaproteobacteria;Other;Other;Other                                        | 6.46% | 2.31% | 2.12% | 3.46% | 2.10% | 1.74% | 1.24% | 0.63% |
| Proteobacteria;Gammaproteobacteria;Pseudomonadales;Moraxellaceae;Acinetobacter              | 0.00% | 0.00% | 0.00% | 0.00% | 0.00% | 0.00% | 0.00% | 0.01% |
| Proteobacteria;Gammaproteobacteria;Pseudomonadales;Other;Other                              | 0.00% | 0.00% | 0.01% | 5.47% | 0.00% | 0.00% | 0.00% | 0.00% |
| Proteobacteria;Gammaproteobacteria;Pseudomonadales;Pseudomonadaceae;Other                   | 0.03% | 0.00% | 0.00% | 0.05% | 0.02% | 0.01% | 0.09% | 0.09% |
| Proteobacteria;Gammaproteobacteria;Pseudomonadales;Pseudomonadaceae;Pseudomonas             | 0.00% | 0.00% | 0.02% | 0.03% | 0.00% | 0.00% | 0.03% | 0.10% |
| Proteobacteria;Gammaproteobacteria;Thiotrichales;Thiotrichales_incertae_sedis;Caedibacter   | 0.01% | 0.00% | 0.00% | 0.00% | 0.00% | 0.00% | 0.00% | 0.00% |
| Proteobacteria;Gammaproteobacteria;Xanthomonadales;Xanthomonadaceae;Other                   | 1.69% | 0.02% | 0.07% | 0.00% | 0.02% | 0.02% | 0.01% | 0.00% |
| Proteobacteria;Gammaproteobacteria;Xanthomonadales;Xanthomonadaceae;Rhodanobacter           | 0.00% | 0.00% | 0.00% | 0.00% | 0.00% | 0.01% | 0.00% | 0.00% |



|                                                                                      |       |        |        |        |       |       |       |       |       |
|--------------------------------------------------------------------------------------|-------|--------|--------|--------|-------|-------|-------|-------|-------|
| Other;Other                                                                          |       |        |        |        |       |       |       |       |       |
| Acidobacteria;Acidobacteria_Gp5;Gp5;Other;Other                                      | 0.00% | 0.00%  | 0.00%  | 0.00%  | 0.00% | 0.00% | 0.00% | 0.00% | 0.00% |
| Acidobacteria;Acidobacteria_Gp6;Gp6;Other;Other                                      | 0.27% | 0.00%  | 0.00%  | 0.20%  | 0.00% | 0.01% | 0.00% | 0.11% | 0.00% |
| Acidobacteria;Acidobacteria_Gp7;Gp7;Other;Other                                      | 0.01% | 0.00%  | 0.00%  | 0.00%  | 0.00% | 0.00% | 0.00% | 0.00% | 0.00% |
| Acidobacteria;Holophagae;Holophagales;Holophagaceae;Geothrix                         | 0.00% | 0.00%  | 0.00%  | 0.00%  | 0.00% | 0.00% | 0.00% | 0.00% | 0.00% |
| Acidobacteria;Holophagae;Other;Other;Other                                           | 0.00% | 0.00%  | 0.00%  | 0.01%  | 0.00% | 0.00% | 0.00% | 0.00% | 0.00% |
| Acidobacteria;Other;Other;Other;Other                                                | 0.03% | 0.00%  | 0.00%  | 0.00%  | 0.00% | 0.00% | 0.00% | 0.00% | 0.00% |
| Actinobacteria;Actinobacteria;Acidimicrobiales;Other;Other                           | 0.00% | 0.00%  | 0.00%  | 0.00%  | 0.00% | 0.00% | 0.00% | 0.00% | 0.00% |
| Actinobacteria;Actinobacteria;Actinomycetales;Actinomycetaceae;Actinomyces           | 0.00% | 0.03%  | 0.21%  | 0.08%  | 0.04% | 0.02% | 0.00% | 0.00% | 0.01% |
| Actinobacteria;Actinobacteria;Actinomycetales;Corynebacteriaceae;Corynebacterium     | 0.00% | 0.00%  | 0.19%  | 0.12%  | 0.04% | 0.18% | 0.01% | 1.27% | 0.08% |
| Actinobacteria;Actinobacteria;Actinomycetales;Corynebacteriaceae;Other               | 0.00% | 0.00%  | 0.00%  | 0.00%  | 0.00% | 0.00% | 0.00% | 0.00% | 0.00% |
| Actinobacteria;Actinobacteria;Actinomycetales;Corynebacteriaceae;Turicella           | 0.00% | 0.30%  | 0.08%  | 0.20%  | 0.01% | 0.00% | 0.03% | 0.00% | 0.00% |
| Actinobacteria;Actinobacteria;Actinomycetales;Dietziaceae;Dietzia                    | 0.00% | 0.00%  | 0.00%  | 0.00%  | 0.00% | 0.00% | 0.00% | 0.75% | 0.00% |
| Actinobacteria;Actinobacteria;Actinomycetales;Intrasporangiaceae;Ornithinimicrobium  | 0.00% | 0.04%  | 0.00%  | 0.00%  | 0.00% | 0.00% | 0.00% | 0.00% | 0.04% |
| Actinobacteria;Actinobacteria;Actinomycetales;Microbacteriaceae;Other                | 0.62% | 0.16%  | 0.48%  | 0.16%  | 0.00% | 0.17% | 0.02% | 0.00% | 0.00% |
| Actinobacteria;Actinobacteria;Actinomycetales;Micrococcaceae;Kocuria                 | 0.00% | 0.00%  | 0.00%  | 0.02%  | 0.00% | 0.00% | 0.00% | 0.00% | 0.00% |
| Actinobacteria;Actinobacteria;Actinomycetales;Micrococcaceae;Nesterenkonia           | 0.00% | 0.00%  | 0.00%  | 0.00%  | 0.02% | 0.01% | 0.00% | 0.00% | 0.00% |
| Actinobacteria;Actinobacteria;Actinomycetales;Micrococcaceae;Rothia                  | 0.00% | 0.00%  | 0.18%  | 0.27%  | 0.00% | 0.09% | 0.00% | 1.63% | 0.00% |
| Actinobacteria;Actinobacteria;Actinomycetales;Mycobacteriaceae;Mycobacterium         | 0.02% | 0.02%  | 0.00%  | 0.20%  | 0.00% | 0.00% | 0.00% | 0.00% | 0.01% |
| Actinobacteria;Actinobacteria;Actinomycetales;Nocardiaceae;Other                     | 0.00% | 0.00%  | 0.00%  | 0.06%  | 0.00% | 0.00% | 0.00% | 0.00% | 0.00% |
| Actinobacteria;Actinobacteria;Actinomycetales;Nocardioidaceae;Nocardioides           | 0.00% | 0.00%  | 0.00%  | 0.13%  | 0.01% | 0.00% | 0.00% | 0.00% | 0.00% |
| Actinobacteria;Actinobacteria;Actinomycetales;Nocardioidaceae;Other                  | 0.00% | 0.00%  | 0.00%  | 0.00%  | 0.00% | 0.00% | 0.03% | 0.17% | 0.00% |
| Actinobacteria;Actinobacteria;Actinomycetales;Other;Other                            | 0.70% | 1.19%  | 2.27%  | 3.85%  | 0.19% | 1.08% | 0.59% | 4.23% | 0.28% |
| Actinobacteria;Actinobacteria;Actinomycetales;Propionibacteriaceae;Other             | 0.00% | 1.60%  | 0.77%  | 0.41%  | 0.06% | 0.18% | 0.05% | 5.82% | 0.07% |
| Actinobacteria;Actinobacteria;Actinomycetales;Propionibacteriaceae;Propionibacterium | 0.06% | 23.10% | 28.45% | 18.11% | 3.04% | 8.15% | 0.73% | 6.24% | 1.24% |
| Actinobacteria;Actinobacteria;Coriobacteriales;Coriobacteriaceae;Eggerthella         | 0.00% | 0.00%  | 0.00%  | 0.00%  | 0.00% | 0.00% | 0.00% | 0.00% | 0.01% |
| Actinobacteria;Actinobacteria;Coriobacteriales;Coriobacteriaceae;Other               | 0.01% | 0.00%  | 0.00%  | 0.00%  | 0.00% | 0.00% | 0.00% | 0.07% | 0.00% |
| Actinobacteria;Actinobacteria;Nitriliruptorales;Nitriliruptoraceae;Nitriliruptor     | 0.00% | 0.00%  | 0.00%  | 0.00%  | 0.00% | 0.00% | 0.00% | 0.00% | 0.00% |
| Actinobacteria;Actinobacteria;Other;Other;Other                                      | 5.96% | 0.40%  | 0.08%  | 1.11%  | 0.01% | 0.54% | 0.01% | 0.86% | 0.05% |
| Actinobacteria;Actinobacteria;Rubrobacteriales;Rubrobacteraceae;Rubrobacter          | 0.00% | 0.00%  | 0.00%  | 0.00%  | 0.01% | 0.00% | 0.00% | 0.00% | 0.00% |
| Actinobacteria;Actinobacteria;Solirubrobacteriales;Other;Other                       | 0.00% | 0.00%  | 0.00%  | 0.00%  | 0.00% | 0.07% | 0.00% | 0.00% | 0.00% |
| Bacteroidetes;Bacteroidia;Bacteroidales;Bacteroidaceae;Bacteroides                   | 0.00% | 0.17%  | 0.07%  | 0.01%  | 0.00% | 0.00% | 0.01% | 0.10% | 0.06% |
| Bacteroidetes;Bacteroidia;Bacteroidales;Other;Other                                  | 0.00% | 0.01%  | 0.00%  | 0.00%  | 0.00% | 0.01% | 0.00% | 0.20% | 0.04% |
| Bacteroidetes;Bacteroidia;Bacteroidales;Porphyromonadaceae;Dysgonomonas              | 0.00% | 0.00%  | 0.00%  | 0.00%  | 0.00% | 0.00% | 0.00% | 0.10% | 0.00% |

|                                                                                     |       |       |       |       |       |       |       |       |       |
|-------------------------------------------------------------------------------------|-------|-------|-------|-------|-------|-------|-------|-------|-------|
| Bacteroidetes;Bacteroidia;Bacteroidales;Porphyromonadaceae;Other                    | 0.00% | 0.00% | 0.00% | 0.00% | 0.00% | 0.00% | 0.00% | 0.00% | 0.02% |
| Bacteroidetes;Bacteroidia;Bacteroidales;Porphyromonadaceae;Parabacteroides          | 0.00% | 0.01% | 0.00% | 0.00% | 0.00% | 0.00% | 0.00% | 0.00% | 0.01% |
| Bacteroidetes;Bacteroidia;Bacteroidales;Porphyromonadaceae;Tannerella               | 0.00% | 0.00% | 0.00% | 0.00% | 0.00% | 0.00% | 0.01% | 0.00% | 0.00% |
| Bacteroidetes;Bacteroidia;Bacteroidales;Prevotellaceae;Prevotella                   | 0.00% | 0.00% | 0.00% | 0.01% | 0.01% | 0.00% | 0.01% | 0.00% | 0.00% |
| Bacteroidetes;Bacteroidia;Bacteroidales;Rikenellaceae;Other                         | 0.00% | 0.00% | 0.00% | 0.00% | 0.00% | 0.00% | 0.00% | 0.00% | 0.03% |
| Bacteroidetes;Flavobacteria;Flavobacteriales;Cryomorphaceae;Other                   | 0.01% | 0.00% | 0.00% | 0.00% | 0.00% | 0.00% | 0.00% | 0.00% | 0.00% |
| Bacteroidetes;Flavobacteria;Flavobacteriales;Flavobacteriaceae;Capnocytophaga       | 0.00% | 0.00% | 0.05% | 0.24% | 0.00% | 0.00% | 0.00% | 0.00% | 0.02% |
| Bacteroidetes;Flavobacteria;Flavobacteriales;Flavobacteriaceae;Chryseobacterium     | 0.00% | 0.00% | 0.00% | 0.00% | 0.00% | 0.02% | 0.00% | 0.00% | 0.00% |
| Bacteroidetes;Flavobacteria;Flavobacteriales;Flavobacteriaceae;Flavobacterium       | 0.10% | 0.00% | 0.00% | 0.00% | 0.00% | 0.00% | 0.00% | 0.00% | 0.04% |
| Bacteroidetes;Flavobacteria;Flavobacteriales;Flavobacteriaceae;Gelidibacter         | 0.00% | 0.00% | 0.00% | 0.00% | 0.00% | 0.00% | 0.00% | 0.00% | 0.00% |
| Bacteroidetes;Flavobacteria;Flavobacteriales;Flavobacteriaceae;Other                | 0.13% | 0.00% | 0.01% | 0.04% | 0.01% | 0.01% | 0.00% | 0.34% | 0.03% |
| Bacteroidetes;Flavobacteria;Flavobacteriales;Flavobacteriaceae;Planobacterium       | 0.00% | 0.00% | 0.00% | 0.00% | 0.00% | 0.00% | 0.01% | 0.00% | 0.00% |
| Bacteroidetes;Flavobacteria;Flavobacteriales;Other;Other                            | 0.01% | 0.00% | 0.00% | 0.06% | 0.00% | 0.00% | 0.00% | 0.00% | 0.00% |
| Bacteroidetes;Other;Other;Other;Other                                               | 1.07% | 0.02% | 0.01% | 0.53% | 0.00% | 0.18% | 0.00% | 0.51% | 0.02% |
| Bacteroidetes;Sphingobacteria;Sphingobacteriales;Chitinophagaceae;Ferruginibacter   | 0.04% | 0.00% | 0.00% | 0.00% | 0.00% | 0.00% | 0.00% | 0.00% | 0.00% |
| Bacteroidetes;Sphingobacteria;Sphingobacteriales;Chitinophagaceae;Flavisolibacter   | 0.00% | 0.00% | 0.00% | 0.00% | 0.00% | 0.01% | 0.00% | 0.00% | 0.00% |
| Bacteroidetes;Sphingobacteria;Sphingobacteriales;Chitinophagaceae;Lacibacter        | 0.01% | 0.00% | 0.00% | 0.00% | 0.00% | 0.00% | 0.00% | 0.00% | 0.00% |
| Bacteroidetes;Sphingobacteria;Sphingobacteriales;Chitinophagaceae;Other             | 0.62% | 0.07% | 0.00% | 0.22% | 0.00% | 4.72% | 0.00% | 0.00% | 0.00% |
| Bacteroidetes;Sphingobacteria;Sphingobacteriales;Chitinophagaceae;Sediminibacterium | 0.10% | 0.89% | 0.00% | 0.00% | 0.02% | 0.00% | 0.04% | 0.00% | 0.19% |
| Bacteroidetes;Sphingobacteria;Sphingobacteriales;Chitinophagaceae;Terrimonas        | 0.01% | 0.00% | 0.00% | 0.00% | 0.00% | 0.15% | 0.00% | 0.00% | 0.00% |
| Bacteroidetes;Sphingobacteria;Sphingobacteriales;Cyclobacteriaceae;Algoriphagus     | 0.00% | 0.00% | 0.00% | 0.00% | 0.00% | 0.00% | 0.00% | 0.00% | 0.00% |
| Bacteroidetes;Sphingobacteria;Sphingobacteriales;Cytophagaceae;Emticicia            | 0.00% | 0.00% | 0.00% | 0.00% | 0.00% | 0.00% | 0.00% | 0.00% | 0.00% |
| Bacteroidetes;Sphingobacteria;Sphingobacteriales;Cytophagaceae;Flexibacter          | 0.00% | 0.00% | 0.00% | 0.00% | 0.00% | 0.00% | 0.00% | 0.00% | 0.00% |
| Bacteroidetes;Sphingobacteria;Sphingobacteriales;Cytophagaceae;Leadbetterella       | 0.01% | 0.00% | 0.00% | 0.00% | 0.00% | 0.00% | 0.00% | 0.00% | 0.00% |
| Bacteroidetes;Sphingobacteria;Sphingobacteriales;Cytophagaceae;Other                | 0.09% | 0.01% | 0.00% | 0.00% | 0.00% | 0.07% | 0.00% | 0.00% | 0.00% |
| Bacteroidetes;Sphingobacteria;Sphingobacteriales;Cytophagaceae;Runella              | 0.01% | 0.03% | 0.00% | 0.00% | 0.00% | 0.00% | 0.00% | 0.00% | 0.00% |
| Bacteroidetes;Sphingobacteria;Sphingobacteriales;Cytophagaceae;Spirosoma            | 0.00% | 0.00% | 0.00% | 0.00% | 0.00% | 0.00% | 0.00% | 0.00% | 0.00% |
| Bacteroidetes;Sphingobacteria;Sphingobacteriales;Other;Other                        | 0.13% | 0.03% | 0.00% | 0.33% | 0.01% | 0.29% | 0.00% | 0.00% | 0.11% |
| Bacteroidetes;Sphingobacteria;Sphingobacteriales;Saprospiraceae;Haliscomenobacter   | 0.00% | 0.00% | 0.00% | 0.00% | 0.00% | 0.00% | 0.00% | 0.00% | 0.00% |
| Bacteroidetes;Sphingobacteria;Sphingobacteriales;Sphingobacteriaceae;Other          | 0.00% | 0.00% | 0.00% | 0.00% | 0.00% | 0.00% | 0.00% | 0.00% | 0.00% |
| Bacteroidetes;Sphingobacteria;Sphingobacteriales;Sphingobacteriaceae;Pedobacter     | 0.00% | 0.00% | 0.00% | 0.00% | 0.01% | 0.00% | 0.00% | 0.00% | 0.00% |



|                                                                                       |        |       |       |       |       |       |       |        |       |
|---------------------------------------------------------------------------------------|--------|-------|-------|-------|-------|-------|-------|--------|-------|
| Firmicutes;Clostridia;Clostridiales;Incertae Sedis XI;Finegoldia                      | 0.00%  | 0.00% | 0.00% | 0.00% | 0.00% | 0.07% | 0.00% | 0.00%  | 0.00% |
| Firmicutes;Clostridia;Clostridiales;Incertae Sedis XI;Peptoniphilus                   | 0.00%  | 0.00% | 0.00% | 0.00% | 0.00% | 0.00% | 0.01% | 0.00%  | 0.00% |
| Firmicutes;Clostridia;Clostridiales;Lachnospiraceae;Other                             | 0.00%  | 0.00% | 0.00% | 0.00% | 0.00% | 0.00% | 0.00% | 0.52%  | 0.00% |
| Firmicutes;Clostridia;Clostridiales;Other;Other                                       | 0.01%  | 0.20% | 0.00% | 0.00% | 0.00% | 0.00% | 0.00% | 0.77%  | 0.01% |
| Firmicutes;Clostridia;Clostridiales;Ruminococcaceae;Oscillibacter                     | 0.00%  | 0.00% | 0.00% | 0.00% | 0.00% | 0.00% | 0.00% | 0.00%  | 0.03% |
| Firmicutes;Clostridia;Clostridiales;Veillonellaceae;Phascolarctobacterium             | 0.00%  | 0.00% | 0.00% | 0.00% | 0.00% | 0.00% | 0.00% | 0.00%  | 0.01% |
| Firmicutes;Clostridia;Clostridiales;Veillonellaceae;Veillonella                       | 0.00%  | 0.03% | 0.39% | 0.00% | 0.00% | 0.00% | 0.00% | 0.00%  | 0.02% |
| Firmicutes;Clostridia;Other;Other;Other                                               | 0.00%  | 0.00% | 0.00% | 0.00% | 0.00% | 0.00% | 0.00% | 0.02%  | 0.00% |
| Firmicutes;Other;Other;Other;Other                                                    | 0.00%  | 0.29% | 2.79% | 0.27% | 0.12% | 0.05% | 0.12% | 1.65%  | 0.49% |
| Fusobacteria;Fusobacteria;Fusobacteriales;Leptotrichiaceae;Leptotrichia               | 0.00%  | 0.00% | 0.00% | 0.71% | 0.00% | 0.00% | 0.00% | 0.00%  | 0.05% |
| Fusobacteria;Fusobacteria;Fusobacteriales;Leptotrichiaceae;Other                      | 0.00%  | 0.00% | 0.00% | 0.01% | 0.00% | 0.00% | 0.00% | 0.00%  | 0.01% |
| Gemmatimonadetes;Gemmatimonadetes;Gemmatimonadales;Gemmatimonadaceae;Gemmatimonas     | 0.01%  | 0.00% | 0.00% | 0.00% | 0.00% | 0.00% | 0.00% | 0.00%  | 0.00% |
| Nitrospira;Nitrospira;Nitrospirales;Nitrospiraceae;Nitrospira                         | 1.31%  | 0.04% | 0.00% | 1.21% | 0.03% | 2.84% | 0.02% | 0.00%  | 0.00% |
| Nitrospira;Nitrospira;Nitrospirales;Nitrospiraceae;Other                              | 0.00%  | 0.00% | 0.00% | 0.00% | 0.00% | 0.00% | 0.00% | 0.00%  | 0.00% |
| Other;Other;Other;Other;Other                                                         | 28.35% | 2.52% | 3.08% | 5.98% | 0.15% | 7.10% | 0.38% | 18.62% | 0.52% |
| Planctomycetes;Planctomycetacia;Planctomycetales;Planctomycetaceae;Other              | 0.00%  | 0.00% | 0.00% | 0.00% | 0.00% | 0.00% | 0.00% | 0.00%  | 0.00% |
| Planctomycetes;Planctomycetacia;Planctomycetales;Planctomycetaceae;Schlesneria        | 0.00%  | 0.00% | 0.00% | 0.00% | 0.00% | 0.00% | 0.00% | 0.00%  | 0.00% |
| Proteobacteria;Alphaproteobacteria;Caulobacterales;Caulobacteraceae;Asticcacaulis     | 0.00%  | 0.00% | 0.00% | 0.00% | 0.00% | 0.03% | 0.00% | 0.00%  | 0.00% |
| Proteobacteria;Alphaproteobacteria;Caulobacterales;Caulobacteraceae;Brevundimonas     | 0.00%  | 1.02% | 0.00% | 0.00% | 0.01% | 1.88% | 0.01% | 0.00%  | 0.00% |
| Proteobacteria;Alphaproteobacteria;Caulobacterales;Caulobacteraceae;Other             | 0.25%  | 0.07% | 0.00% | 0.47% | 0.61% | 1.07% | 0.03% | 0.00%  | 0.00% |
| Proteobacteria;Alphaproteobacteria;Caulobacterales;Caulobacteraceae;Phenyllobacterium | 0.06%  | 0.00% | 0.00% | 0.00% | 0.00% | 0.15% | 0.01% | 0.00%  | 0.00% |
| Proteobacteria;Alphaproteobacteria;Caulobacterales;Other;Other                        | 0.00%  | 0.00% | 0.00% | 0.01% | 0.03% | 0.01% | 0.00% | 0.00%  | 0.00% |
| Proteobacteria;Alphaproteobacteria;Other;Other;Other                                  | 2.19%  | 1.10% | 0.13% | 1.24% | 0.04% | 2.02% | 0.03% | 0.24%  | 0.10% |
| Proteobacteria;Alphaproteobacteria;Rhizobiales;Beijerinckiaceae;Chelatococcus         | 0.00%  | 0.00% | 0.00% | 0.01% | 0.00% | 0.00% | 0.00% | 0.00%  | 0.00% |
| Proteobacteria;Alphaproteobacteria;Rhizobiales;Beijerinckiaceae;Other                 | 0.00%  | 0.01% | 0.00% | 0.00% | 0.00% | 0.02% | 0.00% | 0.00%  | 0.00% |
| Proteobacteria;Alphaproteobacteria;Rhizobiales;Bradyrhizobiaceae;Bosea                | 0.01%  | 0.25% | 0.00% | 0.01% | 0.00% | 0.00% | 0.00% | 0.00%  | 0.00% |
| Proteobacteria;Alphaproteobacteria;Rhizobiales;Bradyrhizobiaceae;Other                | 0.00%  | 0.00% | 0.13% | 0.00% | 0.00% | 0.00% | 0.00% | 0.00%  | 0.01% |
| Proteobacteria;Alphaproteobacteria;Rhizobiales;Hyphomicrobiaceae;Devosia              | 0.00%  | 0.05% | 0.00% | 0.00% | 0.00% | 0.01% | 0.00% | 0.00%  | 0.00% |
| Proteobacteria;Alphaproteobacteria;Rhizobiales;Hyphomicrobiaceae;Filomicrobium        | 0.00%  | 0.00% | 0.00% | 0.00% | 0.00% | 0.01% | 0.00% | 0.00%  | 0.00% |
| Proteobacteria;Alphaproteobacteria;Rhizobiales;Hyphomicrobiaceae;Hyphomicrobium       | 0.01%  | 0.00% | 0.00% | 0.01% | 0.00% | 0.00% | 0.00% | 0.00%  | 0.00% |
| Proteobacteria;Alphaproteobacteria;Rhizobiales;Hyphomicrobiaceae;Other                | 0.14%  | 0.01% | 0.00% | 0.21% | 0.00% | 0.06% | 0.00% | 0.00%  | 0.00% |
| Proteobacteria;Alphaproteobacteria;Rhizobiales;Methylobacteriaceae;Methylobacterium   | 0.01%  | 0.18% | 0.01% | 0.51% | 0.05% | 0.01% | 0.00% | 0.00%  | 0.00% |

|                                                                                          |        |        |       |        |       |        |       |       |       |
|------------------------------------------------------------------------------------------|--------|--------|-------|--------|-------|--------|-------|-------|-------|
| Proteobacteria;Alphaproteobacteria;Rhizobiales;Methylocystaceae;Methylocystis            | 0.02%  | 0.44%  | 0.00% | 0.00%  | 0.00% | 0.00%  | 0.00% | 0.00% | 0.00% |
| Proteobacteria;Alphaproteobacteria;Rhizobiales;Methylocystaceae;Other                    | 0.00%  | 0.00%  | 0.00% | 0.00%  | 0.00% | 0.00%  | 0.00% | 0.00% | 0.00% |
| Proteobacteria;Alphaproteobacteria;Rhizobiales;Other;Other                               | 0.48%  | 23.34% | 0.57% | 3.16%  | 0.45% | 1.23%  | 0.02% | 0.13% | 0.12% |
| Proteobacteria;Alphaproteobacteria;Rhizobiales;Phyllobacteriaceae;Other                  | 0.00%  | 0.00%  | 0.00% | 0.00%  | 0.00% | 0.01%  | 0.00% | 0.00% | 0.00% |
| Proteobacteria;Alphaproteobacteria;Rhizobiales;Rhodobiaceae;Parvibaculum                 | 0.00%  | 0.00%  | 0.00% | 0.00%  | 0.00% | 0.00%  | 0.00% | 0.00% | 0.00% |
| Proteobacteria;Alphaproteobacteria;Rhodobacterales;Rhodobacteraceae;Other                | 0.09%  | 0.00%  | 0.02% | 0.05%  | 0.03% | 0.80%  | 0.01% | 0.12% | 0.01% |
| Proteobacteria;Alphaproteobacteria;Rhodobacterales;Rhodobacteraceae;Paracoccus           | 0.00%  | 0.00%  | 0.20% | 0.10%  | 0.54% | 0.07%  | 0.01% | 0.18% | 0.00% |
| Proteobacteria;Alphaproteobacteria;Rhodobacterales;Rhodobacteraceae;Rhodobacter          | 0.02%  | 0.00%  | 0.00% | 0.00%  | 0.00% | 0.00%  | 0.00% | 0.00% | 0.01% |
| Proteobacteria;Alphaproteobacteria;Rhodobacterales;Rhodobacteraceae;Rubellimicrobium     | 0.00%  | 0.00%  | 0.15% | 0.00%  | 0.00% | 0.00%  | 0.00% | 0.00% | 0.00% |
| Proteobacteria;Alphaproteobacteria;Rhodospirillales;Acetobacteraceae;Other               | 0.48%  | 0.04%  | 2.54% | 0.53%  | 0.00% | 0.00%  | 0.17% | 0.00% | 0.00% |
| Proteobacteria;Alphaproteobacteria;Rhodospirillales;Acetobacteraceae;Roseomonas          | 0.01%  | 0.00%  | 0.00% | 0.00%  | 0.00% | 0.00%  | 0.00% | 0.00% | 0.00% |
| Proteobacteria;Alphaproteobacteria;Rhodospirillales;Other;Other                          | 0.13%  | 0.00%  | 0.03% | 0.00%  | 0.00% | 0.03%  | 0.01% | 0.00% | 0.00% |
| Proteobacteria;Alphaproteobacteria;Rhodospirillales;Rhodospirillaceae;Other              | 0.02%  | 0.00%  | 0.00% | 0.00%  | 0.03% | 0.01%  | 0.00% | 0.00% | 0.00% |
| Proteobacteria;Alphaproteobacteria;Rickettsiales;SAR11;Pelagibacter                      | 12.64% | 2.04%  | 0.01% | 12.74% | 0.02% | 6.66%  | 0.03% | 0.00% | 0.11% |
| Proteobacteria;Alphaproteobacteria;Sphingomonadales;Erythrobacteraceae;Other             | 0.00%  | 0.00%  | 0.00% | 0.00%  | 0.00% | 0.00%  | 0.00% | 0.00% | 0.00% |
| Proteobacteria;Alphaproteobacteria;Sphingomonadales;Other;Other                          | 0.06%  | 7.52%  | 0.40% | 0.07%  | 0.01% | 2.35%  | 0.10% | 0.09% | 0.17% |
| Proteobacteria;Alphaproteobacteria;Sphingomonadales;Sphingomonadaceae;N ovosphingobium   | 0.23%  | 0.00%  | 0.00% | 0.00%  | 0.00% | 0.00%  | 0.00% | 0.00% | 0.00% |
| Proteobacteria;Alphaproteobacteria;Sphingomonadales;Sphingomonadaceae;Other              | 0.05%  | 0.83%  | 0.61% | 0.15%  | 0.09% | 16.97% | 0.16% | 0.00% | 0.18% |
| Proteobacteria;Alphaproteobacteria;Sphingomonadales;Sphingomonadaceae;S andaracinobacter | 0.06%  | 0.00%  | 0.00% | 0.00%  | 0.00% | 0.05%  | 0.00% | 0.43% | 0.00% |
| Proteobacteria;Alphaproteobacteria;Sphingomonadales;Sphingomonadaceae;S phingosinicella  | 0.00%  | 0.00%  | 0.00% | 0.00%  | 0.00% | 0.00%  | 0.00% | 0.00% | 0.00% |
| Proteobacteria;Alphaproteobacteria;Sphingomonadales;Sphingomonadaceae;Z ymomonas         | 0.00%  | 0.00%  | 0.00% | 0.00%  | 0.00% | 0.12%  | 0.00% | 0.00% | 0.00% |
| Proteobacteria;Betaproteobacteria;Burkholderiales;Alcaligenaceae;Achromobacter           | 0.01%  | 2.72%  | 7.71% | 2.24%  | 0.10% | 0.56%  | 0.02% | 1.14% | 0.16% |
| Proteobacteria;Betaproteobacteria;Burkholderiales;Alcaligenaceae;Azohydromonas           | 0.00%  | 0.00%  | 0.00% | 0.00%  | 0.00% | 0.00%  | 0.00% | 0.00% | 0.00% |
| Proteobacteria;Betaproteobacteria;Burkholderiales;Alcaligenaceae;Other                   | 0.05%  | 0.09%  | 0.09% | 0.13%  | 0.01% | 0.08%  | 0.00% | 0.02% | 0.00% |
| Proteobacteria;Betaproteobacteria;Burkholderiales;Burkholderiaceae;Burkholderia          | 0.00%  | 0.00%  | 0.00% | 0.00%  | 0.00% | 0.00%  | 0.00% | 0.00% | 0.00% |
| Proteobacteria;Betaproteobacteria;Burkholderiales;Burkholderiaceae;Cupriavidus           | 0.00%  | 0.98%  | 0.00% | 0.00%  | 0.00% | 0.00%  | 0.00% | 0.48% | 0.00% |
| Proteobacteria;Betaproteobacteria;Burkholderiales;Burkholderiaceae;Other                 | 0.13%  | 0.00%  | 0.00% | 0.00%  | 0.00% | 0.01%  | 0.00% | 0.00% | 0.00% |
| Proteobacteria;Betaproteobacteria;Burkholderiales;Burkholderiaceae;Polynucle             | 0.65%  | 0.65%  | 0.22% | 3.69%  | 0.01% | 2.85%  | 0.00% | 0.00% | 0.00% |

obacter

|                                                                                                    |       |       |        |        |       |        |        |        |        |
|----------------------------------------------------------------------------------------------------|-------|-------|--------|--------|-------|--------|--------|--------|--------|
| Proteobacteria;Betaproteobacteria;Burkholderiales;Burkholderiales_incertae_se<br>dis;Aquabacterium | 0.05% | 0.03% | 0.00%  | 0.01%  | 0.08% | 0.00%  | 0.00%  | 0.00%  | 0.02%  |
| Proteobacteria;Betaproteobacteria;Burkholderiales;Burkholderiales_incertae_se<br>dis;Methylibium   | 0.01% | 0.00% | 0.00%  | 0.00%  | 0.00% | 0.00%  | 0.00%  | 0.00%  | 0.00%  |
| Proteobacteria;Betaproteobacteria;Burkholderiales;Burkholderiales_incertae_se<br>dis;Other         | 0.33% | 0.26% | 0.45%  | 0.11%  | 0.00% | 0.03%  | 0.00%  | 0.00%  | 0.01%  |
| Proteobacteria;Betaproteobacteria;Burkholderiales;Burkholderiales_incertae_se<br>dis;Paucibacter   | 0.00% | 0.00% | 0.00%  | 0.00%  | 0.01% | 0.00%  | 0.00%  | 0.00%  | 0.00%  |
| Proteobacteria;Betaproteobacteria;Burkholderiales;Burkholderiales_incertae_se<br>dis;Rubrivivax    | 0.00% | 0.00% | 0.00%  | 0.00%  | 0.00% | 0.00%  | 0.00%  | 0.00%  | 0.00%  |
| Proteobacteria;Betaproteobacteria;Burkholderiales;Comamonadaceae;Acidovorax                        | 0.00% | 0.00% | 0.00%  | 0.00%  | 0.00% | 0.00%  | 0.70%  | 0.04%  | 0.00%  |
| Proteobacteria;Betaproteobacteria;Burkholderiales;Comamonadaceae;Brachymonas                       | 0.58% | 0.25% | 0.00%  | 1.52%  | 0.00% | 0.55%  | 0.00%  | 0.00%  | 0.00%  |
| Proteobacteria;Betaproteobacteria;Burkholderiales;Comamonadaceae;Comamonas                         | 0.00% | 0.00% | 0.00%  | 0.01%  | 0.00% | 0.00%  | 0.00%  | 0.00%  | 0.00%  |
| Proteobacteria;Betaproteobacteria;Burkholderiales;Comamonadaceae;Curvibacter                       | 0.00% | 0.02% | 0.00%  | 0.00%  | 0.00% | 0.03%  | 0.00%  | 0.00%  | 0.00%  |
| Proteobacteria;Betaproteobacteria;Burkholderiales;Comamonadaceae;Delftia                           | 0.01% | 5.18% | 1.91%  | 0.67%  | 0.16% | 1.50%  | 0.07%  | 6.29%  | 0.37%  |
| Proteobacteria;Betaproteobacteria;Burkholderiales;Comamonadaceae;Hydrogenophaga                    | 0.04% | 0.00% | 0.00%  | 0.02%  | 0.00% | 0.05%  | 0.01%  | 0.00%  | 87.07% |
| Proteobacteria;Betaproteobacteria;Burkholderiales;Comamonadaceae;Other                             | 4.17% | 8.36% | 14.04% | 22.89% | 0.03% | 16.05% | 95.42% | 19.58% | 6.14%  |
| Proteobacteria;Betaproteobacteria;Burkholderiales;Comamonadaceae;Pelomonas                         | 0.01% | 1.86% | 3.07%  | 0.69%  | 0.00% | 0.05%  | 0.01%  | 1.48%  | 0.03%  |
| Proteobacteria;Betaproteobacteria;Burkholderiales;Comamonadaceae;Polaromonas                       | 0.00% | 0.00% | 0.00%  | 0.00%  | 0.00% | 0.00%  | 0.00%  | 0.00%  | 0.06%  |
| Proteobacteria;Betaproteobacteria;Burkholderiales;Comamonadaceae;Pseudorhodoferrax                 | 0.00% | 0.00% | 0.00%  | 0.00%  | 0.00% | 0.00%  | 0.00%  | 0.00%  | 0.00%  |
| Proteobacteria;Betaproteobacteria;Burkholderiales;Comamonadaceae;Ramlibacter                       | 0.01% | 0.00% | 0.00%  | 0.00%  | 0.00% | 0.00%  | 0.00%  | 0.00%  | 0.00%  |
| Proteobacteria;Betaproteobacteria;Burkholderiales;Comamonadaceae;Rhodoferrax                       | 0.02% | 0.00% | 0.00%  | 0.00%  | 0.01% | 0.06%  | 0.00%  | 0.00%  | 0.00%  |
| Proteobacteria;Betaproteobacteria;Burkholderiales;Comamonadaceae;Roseateles                        | 0.00% | 0.00% | 0.00%  | 0.00%  | 0.00% | 0.00%  | 0.00%  | 0.00%  | 0.00%  |
| Proteobacteria;Betaproteobacteria;Burkholderiales;Comamonadaceae;Schlegelella                      | 0.06% | 0.00% | 0.00%  | 0.00%  | 0.00% | 0.00%  | 0.00%  | 0.00%  | 0.00%  |
| Proteobacteria;Betaproteobacteria;Burkholderiales;Comamonadaceae;Variovorax                        | 0.00% | 0.00% | 0.00%  | 0.00%  | 0.00% | 0.00%  | 0.00%  | 0.00%  | 0.00%  |
| Proteobacteria;Betaproteobacteria;Burkholderiales;Other;Other                                      | 2.98% | 0.57% | 0.40%  | 2.13%  | 0.01% | 3.19%  | 0.27%  | 0.15%  | 0.05%  |
| Proteobacteria;Betaproteobacteria;Burkholderiales;Oxalobacteraceae;Herbaspirillum                  | 0.00% | 0.03% | 0.00%  | 0.00%  | 0.00% | 0.00%  | 0.01%  | 0.00%  | 0.00%  |
| Proteobacteria;Betaproteobacteria;Burkholderiales;Oxalobacteraceae;Massilia                        | 0.00% | 0.00% | 0.00%  | 0.00%  | 0.00% | 0.00%  | 0.00%  | 0.00%  | 0.00%  |
| Proteobacteria;Betaproteobacteria;Burkholderiales;Oxalobacteraceae;Other                           | 0.09% | 0.04% | 0.00%  | 0.05%  | 0.34% | 0.37%  | 0.03%  | 0.13%  | 0.00%  |
| Proteobacteria;Betaproteobacteria;Hydrogenophilaales;Hydrogenophilaceae;Thiobacter                 | 0.08% | 0.00% | 0.00%  | 0.00%  | 0.00% | 0.00%  | 0.00%  | 0.84%  | 0.00%  |





|                                                                                              |        |       |       |       |        |       |       |       |       |
|----------------------------------------------------------------------------------------------|--------|-------|-------|-------|--------|-------|-------|-------|-------|
| Proteobacteria;Epsilonproteobacteria;Campylobacteriales;Campylobacteraceae;Arcobacter        | 0.02%  | 0.00% | 0.00% | 0.00% | 0.00%  | 0.00% | 0.00% | 0.01% | 0.00% |
| Proteobacteria;Epsilonproteobacteria;Campylobacteriales;Campylobacteraceae;Campylobacter     | 0.00%  | 0.00% | 0.00% | 0.27% | 0.00%  | 0.00% | 0.00% | 0.10% | 0.00% |
| Proteobacteria;Epsilonproteobacteria;Campylobacteriales;Helicobacteraceae;Other              | 1.72%  | 0.09% | 0.01% | 0.04% | 0.00%  | 0.34% | 0.00% | 0.00% | 0.06% |
| Proteobacteria;Epsilonproteobacteria;Campylobacteriales;Helicobacteraceae;Sulfuricurvum      | 0.44%  | 0.00% | 0.00% | 0.32% | 0.00%  | 0.07% | 0.00% | 0.00% | 0.14% |
| Proteobacteria;Epsilonproteobacteria;Campylobacteriales;Helicobacteraceae;Sulfurovum         | 0.00%  | 0.00% | 0.00% | 0.00% | 0.00%  | 0.00% | 0.00% | 0.00% | 0.00% |
| Proteobacteria;Epsilonproteobacteria;Campylobacteriales;Other;Other                          | 15.09% | 0.03% | 0.30% | 0.54% | 0.00%  | 0.03% | 0.00% | 0.93% | 0.00% |
| Proteobacteria;Epsilonproteobacteria;Other;Other;Other                                       | 0.01%  | 0.00% | 0.00% | 0.00% | 0.00%  | 0.00% | 0.00% | 0.00% | 0.00% |
| Proteobacteria;Gammaproteobacteria;Alteromonadales;Aeromonadaceae;Aeromonas                  | 0.00%  | 0.00% | 0.32% | 0.00% | 0.00%  | 0.00% | 0.01% | 0.93% | 0.03% |
| Proteobacteria;Gammaproteobacteria;Alteromonadales;Other;Other                               | 0.00%  | 0.00% | 0.01% | 0.00% | 0.00%  | 0.00% | 0.00% | 0.01% | 0.00% |
| Proteobacteria;Gammaproteobacteria;Alteromonadales;Alteromonadaceae;Alteromonas              | 0.00%  | 0.00% | 0.00% | 0.04% | 0.00%  | 0.00% | 0.00% | 0.00% | 0.00% |
| Proteobacteria;Gammaproteobacteria;Cardiobacteriales;Cardiobacteriaceae;Cardiobacterium      | 0.00%  | 0.00% | 0.00% | 0.00% | 0.00%  | 0.00% | 0.00% | 0.00% | 0.01% |
| Proteobacteria;Gammaproteobacteria;Chromatiales;Halothiobacillaceae;Thiovirga                | 0.00%  | 0.00% | 0.00% | 0.02% | 0.00%  | 0.00% | 0.00% | 0.00% | 0.00% |
| Proteobacteria;Gammaproteobacteria;Enterobacteriales;Enterobacteriaceae;Buttiauxella         | 0.00%  | 0.00% | 0.00% | 0.00% | 0.00%  | 0.00% | 0.00% | 0.00% | 0.01% |
| Proteobacteria;Gammaproteobacteria;Enterobacteriales;Enterobacteriaceae;Escherichia/Shigella | 0.00%  | 0.36% | 0.20% | 0.08% | 0.01%  | 0.02% | 0.05% | 0.99% | 0.18% |
| Proteobacteria;Gammaproteobacteria;Enterobacteriales;Enterobacteriaceae;Other                | 0.00%  | 0.04% | 0.02% | 0.01% | 0.01%  | 0.00% | 0.00% | 0.17% | 0.03% |
| Proteobacteria;Gammaproteobacteria;Legionellales;Coxiellaceae;Aquicella                      | 0.01%  | 0.00% | 0.00% | 0.00% | 0.00%  | 0.00% | 0.00% | 0.00% | 0.00% |
| Proteobacteria;Gammaproteobacteria;Legionellales;Legionellaceae;Legionella                   | 0.00%  | 0.00% | 0.00% | 0.00% | 0.00%  | 0.00% | 0.00% | 0.00% | 0.00% |
| Proteobacteria;Gammaproteobacteria;Legionellales;Legionellaceae;Other                        | 0.00%  | 0.00% | 0.00% | 0.00% | 0.00%  | 0.00% | 0.00% | 0.00% | 0.00% |
| Proteobacteria;Gammaproteobacteria;Methylococcales;Methylococcaceae;Methylomonas             | 0.00%  | 0.00% | 0.00% | 0.00% | 0.00%  | 0.00% | 0.00% | 0.00% | 0.00% |
| Proteobacteria;Gammaproteobacteria;Methylococcales;Methylococcaceae;Methylosarcina           | 0.00%  | 0.00% | 0.00% | 0.00% | 0.00%  | 0.00% | 0.00% | 0.00% | 0.00% |
| Proteobacteria;Gammaproteobacteria;Methylococcales;Methylococcaceae;Methylosoma              | 0.01%  | 0.00% | 0.00% | 0.00% | 0.00%  | 0.00% | 0.00% | 0.00% | 0.00% |
| Proteobacteria;Gammaproteobacteria;Methylococcales;Methylococcaceae;Other                    | 0.01%  | 0.00% | 0.00% | 0.00% | 0.00%  | 0.00% | 0.00% | 0.00% | 0.00% |
| Proteobacteria;Gammaproteobacteria;Oceanospirillales;Halomonadaceae;Halomonas                | 0.00%  | 0.00% | 0.00% | 0.00% | 0.00%  | 0.00% | 0.00% | 0.00% | 0.00% |
| Proteobacteria;Gammaproteobacteria;Other;Other;Other                                         | 3.87%  | 0.31% | 4.62% | 1.14% | 75.99% | 1.32% | 0.05% | 0.29% | 0.14% |
| Proteobacteria;Gammaproteobacteria;Pasteurellales;Pasteurellaceae;Haemophilus                | 0.00%  | 0.07% | 0.00% | 0.00% | 0.00%  | 0.00% | 0.00% | 0.00% | 0.00% |
| Proteobacteria;Gammaproteobacteria;Pasteurellales;Pasteurellaceae;Other                      | 0.00%  | 0.00% | 0.00% | 0.00% | 0.00%  | 0.01% | 0.00% | 0.00% | 0.00% |



SM-5. BLASTN 2.2.31 results for reads extracted from fasta file.

WA 1 inlet

Enterobacteria reads extracted (\*pathogenic hits: *Shigella sonnei*, *Shigella dysentery*, *Escherichia fergusonii*, *E coli*, ...)

|                                                                                                            | Max Score | Total Score | Query Cover | E value | Identity |
|------------------------------------------------------------------------------------------------------------|-----------|-------------|-------------|---------|----------|
| <a href="#">Escherichia fergusonii strain ATCC 35469 16S ribosomal RNA gene, complete sequence</a>         | 305       | 305         | 96%         | 3e-83   | 98%      |
| <a href="#">Shigella sonnei Ss046 strain Ss046 16S ribosomal RNA, complete sequence</a>                    | 305       | 305         | 96%         | 3e-83   | 98%      |
| <a href="#">Shigella dysenteriae Sd197 strain Sd197 16S ribosomal RNA, complete sequence</a>               | 305       | 305         | 96%         | 3e-83   | 98%      |
| <a href="#">Escherichia coli O157:H7 str. Sakai strain Sakai 16S ribosomal RNA, complete sequence</a>      | 305       | 305         | 96%         | 3e-83   | 98%      |
| <a href="#">Shigella flexneri 2a str. 301 strain 301 16S ribosomal RNA, complete sequence</a>              | 305       | 305         | 96%         | 3e-83   | 98%      |
| <a href="#">Escherichia fergusonii strain NBRC 102419 16S ribosomal RNA gene, partial sequence</a>         | 305       | 305         | 96%         | 3e-83   | 98%      |
| <a href="#">Escherichia coli strain NBRC 102203 16S ribosomal RNA gene, partial sequence</a>               | 305       | 305         | 96%         | 3e-83   | 98%      |
| <a href="#">Shigella sonnei strain CECT 4887 16S ribosomal RNA gene, partial sequence</a>                  | 305       | 305         | 96%         | 3e-83   | 98%      |
| <a href="#">Pectobacterium carotovorum strain ATCC 15713 16S ribosomal RNA gene, partial sequence</a>      | 305       | 305         | 96%         | 3e-83   | 98%      |
| <a href="#">Brenneria alni strain pvfi20 16S ribosomal RNA gene, partial sequence</a>                      | 305       | 305         | 96%         | 3e-83   | 98%      |
| <a href="#">Escherichia coli str. K-12 substr. MG1655 strain K-12 16S ribosomal RNA, complete sequence</a> | 305       | 305         | 96%         | 3e-83   | 98%      |

|                                                                                                   | Max Score | Total Score | Query Cover | E value | Identity |
|---------------------------------------------------------------------------------------------------|-----------|-------------|-------------|---------|----------|
| <a href="#">Escherichia coli strain JCM 1649 16S ribosomal RNA gene, partial sequence</a>         | 305       | 305         | 96%         | 3e-83   | 98%      |
| <a href="#">Escherichia fergusonii strain ATCC 35469 16S ribosomal RNA gene, partial sequence</a> | 305       | 305         | 96%         | 3e-83   | 98%      |
| <a href="#">Escherichia albertii strain Albert 19982 16S ribosomal RNA gene, partial sequence</a> | 305       | 305         | 96%         | 3e-83   | 98%      |
| <a href="#">Shigella flexneri strain ATCC 29903 16S ribosomal RNA gene, partial sequence</a>      | 305       | 305         | 96%         | 3e-83   | 98%      |
| <a href="#">Shigella dysenteriae strain ATCC 13313 16S ribosomal RNA gene, partial sequence</a>   | 305       | 305         | 96%         | 3e-83   | 98%      |
| <a href="#">Escherichia vulneris strain ATCC 33821 16S ribosomal RNA gene, complete sequence</a>  | 303       | 303         | 95%         | 1e-82   | 98%      |
| <a href="#">Escherichia coli strain U 5/41 16S ribosomal RNA gene, partial sequence</a>           | 302       | 302         | 96%         | 4e-82   | 97%      |
| <a href="#">Shigella boydii strain P288 16S ribosomal RNA gene, partial sequence</a>              | 300       | 300         | 96%         | 1e-81   | 97%      |
| <a href="#">Shigella boydii Sb227 strain Sb227 16S ribosomal RNA, complete sequence</a>           | 300       | 300         | 96%         | 1e-81   | 97%      |
| <a href="#">Erwinia pyrifoliae Ep1/96 strain Ep1/96 16S ribosomal RNA, complete sequence</a>      | 283       | 283         | 96%         | 1e-76   | 96%      |
| <a href="#">Xenorhabdus ishibashii strain GDh7 16S ribosomal RNA gene, partial sequence</a>       | 283       | 283         | 96%         | 1e-76   | 96%      |
| <a href="#">Citrobacter amalonaticus strain CECT 863 16S ribosomal RNA gene, partial sequence</a> | 283       | 283         | 96%         | 1e-76   | 96%      |
| <a href="#">Citrobacter amalonaticus strain LMG 7873 16S ribosomal RNA gene, partial sequence</a> | 283       | 283         | 96%         | 1e-76   | 96%      |
| <a href="#">Erwinia pyrifoliae strain DSM 12163 16S ribosomal RNA gene, partial sequence</a>      | 283       | 283         | 96%         | 1e-76   | 96%      |

WA source water

Enterobacteria reads extracted (\*pathogenic hits: *Shigella sonnei*, *Shigella dysentery*, *Escherichia fergusonii*, *E coli*, ...)

|                                                                                                            | Max Score | Total Score | Query Cover | E value | Identity |
|------------------------------------------------------------------------------------------------------------|-----------|-------------|-------------|---------|----------|
| <a href="#">Escherichia fergusonii strain ATCC 35469 16S ribosomal RNA gene, complete sequence</a>         | 294       | 294         | 98%         | 7e-80   | 97%      |
| <a href="#">Shigella sonnei Ss046 strain Ss046 16S ribosomal RNA, complete sequence</a>                    | 294       | 294         | 98%         | 7e-80   | 97%      |
| <a href="#">Shigella dysenteriae Sd197 strain Sd197 16S ribosomal RNA, complete sequence</a>               | 294       | 294         | 98%         | 7e-80   | 97%      |
| <a href="#">Escherichia coli O157:H7 str. Sakai strain Sakai 16S ribosomal RNA, complete sequence</a>      | 294       | 294         | 98%         | 7e-80   | 97%      |
| <a href="#">Shigella flexneri 2a str. 301 strain 301 16S ribosomal RNA, complete sequence</a>              | 294       | 294         | 98%         | 7e-80   | 97%      |
| <a href="#">Escherichia fergusonii strain NBRC 102419 16S ribosomal RNA gene, partial sequence</a>         | 294       | 294         | 98%         | 7e-80   | 97%      |
| <a href="#">Escherichia coli strain NBRC 102203 16S ribosomal RNA gene, partial sequence</a>               | 294       | 294         | 98%         | 7e-80   | 97%      |
| <a href="#">Shigella sonnei strain CECT 4887 16S ribosomal RNA gene, partial sequence</a>                  | 294       | 294         | 98%         | 7e-80   | 97%      |
| <a href="#">Brenneria alni strain pvfi20 16S ribosomal RNA gene, partial sequence</a>                      | 294       | 294         | 98%         | 7e-80   | 97%      |
| <a href="#">Escherichia coli str. K-12 substr. MG1655 strain K-12 16S ribosomal RNA, complete sequence</a> | 294       | 294         | 98%         | 7e-80   | 97%      |
| <a href="#">Escherichia coli strain JCM 1649 16S ribosomal RNA gene, partial sequence</a>                  | 294       | 294         | 98%         | 7e-80   | 97%      |
| <a href="#">Escherichia fergusonii strain ATCC 35469 16S ribosomal RNA gene, partial sequence</a>          | 294       | 294         | 98%         | 7e-80   | 97%      |
| <a href="#">Escherichia albertii strain Albert 19982 16S ribosomal RNA gene, partial sequence</a>          | 294       | 294         | 98%         | 7e-80   | 97%      |

|                                                                                                       | Max Score | Total Score | Query Cover | E value | Identity |
|-------------------------------------------------------------------------------------------------------|-----------|-------------|-------------|---------|----------|
| <a href="#">Shigella flexneri strain ATCC 29903 16S ribosomal RNA gene, partial sequence</a>          | 294       | 294         | 98%         | 7e-80   | 97%      |
| <a href="#">Shigella dysenteriae strain ATCC 13313 16S ribosomal RNA gene, partial sequence</a>       | 294       | 294         | 98%         | 7e-80   | 97%      |
| <a href="#">Escherichia vulneris strain ATCC 33821 16S ribosomal RNA gene, complete sequence</a>      | 294       | 294         | 98%         | 7e-80   | 97%      |
| <a href="#">Escherichia coli strain U 5/41 16S ribosomal RNA gene, partial sequence</a>               | 291       | 291         | 98%         | 8e-79   | 97%      |
| <a href="#">Shigella boydii strain P288 16S ribosomal RNA gene, partial sequence</a>                  | 289       | 289         | 98%         | 3e-78   | 97%      |
| <a href="#">Pectobacterium carotovorum strain ATCC 15713 16S ribosomal RNA gene, partial sequence</a> | 289       | 289         | 98%         | 3e-78   | 97%      |
| <a href="#">Shigella boydii Sb227 strain Sb227 16S ribosomal RNA, complete sequence</a>               | 289       | 289         | 98%         | 3e-78   | 97%      |
| <a href="#">Erwinia chrysanthemi strain DSM 4610 16S ribosomal RNA gene, partial sequence</a>         | 267       | 267         | 98%         | 1e-71   | 94%      |

SA-2 tank

Gammaproteobacteria reads extracted

|                                                                                                          | Max Score | Total Score | Query Cover | E value | Identity |
|----------------------------------------------------------------------------------------------------------|-----------|-------------|-------------|---------|----------|
| <a href="#">Pseudomonas guineae strain M8 16S ribosomal RNA gene, partial sequence</a>                   | 287       | 287         | 96%         | 1e-77   | 96%      |
| <a href="#">Pseudomonas peli strain R-20805 16S ribosomal RNA gene, partial sequence</a>                 | 287       | 287         | 96%         | 1e-77   | 96%      |
| <a href="#">Serpens flexibilis strain ATCC 29606 16S ribosomal RNA gene, partial sequence</a>            | 281       | 281         | 96%         | 6e-76   | 96%      |
| <a href="#">Pseudomonas tuomuerensis strain 78-123 16S ribosomal RNA gene, partial sequence</a>          | 281       | 281         | 96%         | 6e-76   | 96%      |
| <a href="#">Pseudomonas cuatrocienegasensis strain 1N 16S ribosomal RNA gene, partial sequence</a>       | 272       | 272         | 93%         | 4e-73   | 95%      |
| <a href="#">Pseudomonas oleovorans strain ATCC 8062 16S ribosomal RNA gene, partial sequence</a>         | 267       | 267         | 96%         | 2e-71   | 94%      |
| <a href="#">Pseudomonas pohangensis strain H3-R18 16S ribosomal RNA gene, partial sequence</a>           | 267       | 267         | 93%         | 2e-71   | 95%      |
| <a href="#">Pseudomonas pseudoalcaligenes strain NBRC 14167 16S ribosomal RNA gene, partial sequence</a> | 265       | 265         | 96%         | 6e-71   | 94%      |
| <a href="#">Pseudomonas anguilliseptica strain S 1 16S ribosomal RNA gene, partial sequence</a>          | 265       | 265         | 96%         | 6e-71   | 94%      |
| <a href="#">Pseudomonas indoloxydans strain IPL-1 16S ribosomal RNA gene, partial sequence</a>           | 265       | 265         | 96%         | 6e-71   | 94%      |
| <a href="#">Pseudomonas pseudoalcaligenes strain JCM 5968 16S ribosomal RNA gene, complete sequence</a>  | 265       | 265         | 96%         | 6e-71   | 94%      |
| <a href="#">Pseudomonas pseudoalcaligenes strain Stanier 63 16S ribosomal RNA gene, partial sequence</a> | 265       | 265         | 96%         | 6e-71   | 94%      |
| <a href="#">Pseudomonas helmanticensis strain OHA11 16S ribosomal RNA gene, partial sequence</a>         | 261       | 261         | 93%         | 8e-70   | 94%      |



|                                                                                                            | Max Score | Total Score | Query Cover | E value | Identity |
|------------------------------------------------------------------------------------------------------------|-----------|-------------|-------------|---------|----------|
| <a href="#"><u>Pseudomonas taeanensis strain MS-3 16S ribosomal RNA gene, partial sequence</u></a>         | 261       | 261         | 93%         | 8e-70   | 94%      |
| <a href="#"><u>Pseudomonas sabulinigri strain J64 16S ribosomal RNA gene, partial sequence</u></a>         | 261       | 261         | 93%         | 8e-70   | 94%      |
| <a href="#"><u>Pseudomonas chengduensis strain MBR 16S ribosomal RNA gene, partial sequence</u></a>        | 259       | 259         | 96%         | 3e-69   | 93%      |
| <a href="#"><u>Pseudomonas alcaliphila strain NBRC 102411 16S ribosomal RNA gene, partial sequence</u></a> | 259       | 259         | 96%         | 3e-69   | 93%      |

SA source water

Mycobacterium reads extracted

|                                                                                                           | Max Score | Total Score | Query Cover | E value | Identity |
|-----------------------------------------------------------------------------------------------------------|-----------|-------------|-------------|---------|----------|
| <a href="#">Mycobacterium smegmatis strain DSM 43756 16S ribosomal RNA gene, partial sequence</a>         | 268       | 268         | 100%        | 4e-72   | 99%      |
| <a href="#">Mycobacterium smegmatis str. MC2 155 strain MC2 155 16S ribosomal RNA, complete sequence</a>  | 268       | 268         | 100%        | 4e-72   | 99%      |
| <a href="#">Mycobacterium bacteremicum strain ATCC 25791 16S ribosomal RNA gene, partial sequence</a>     | 268       | 268         | 100%        | 4e-72   | 99%      |
| <a href="#">Mycobacterium neoaurum strain ATCC 25795 16S ribosomal RNA gene, partial sequence</a>         | 268       | 268         | 100%        | 4e-72   | 99%      |
| <a href="#">Mycobacterium wolinskyi strain ATCC 700010 16S ribosomal RNA gene, partial sequence</a>       | 268       | 268         | 100%        | 4e-72   | 99%      |
| <a href="#">Mycobacterium smegmatis strain ATCC 19420 16S ribosomal RNA gene, partial sequence</a>        | 268       | 268         | 100%        | 4e-72   | 99%      |
| <a href="#">Mycobacterium hackensackense strain 147-0552 16S ribosomal RNA gene, partial sequence</a>     | 268       | 268         | 100%        | 4e-72   | 99%      |
| <a href="#">Mycobacterium fluoranthenivorans strain FA4 16S ribosomal RNA gene, complete sequence</a>     | 268       | 268         | 100%        | 4e-72   | 99%      |
| <a href="#">Mycobacterium diernhoferi strain ATCC 19340 16S ribosomal RNA gene, partial sequence</a>      | 268       | 268         | 100%        | 4e-72   | 99%      |
| <a href="#">Mycobacterium neoaurum strain ATCC 25795 16S ribosomal RNA gene, partial sequence</a>         | 268       | 268         | 100%        | 4e-72   | 99%      |
| <a href="#">Mycobacterium cosmeticum strain LTA-388 16S ribosomal RNA gene, partial sequence</a>          | 268       | 268         | 100%        | 4e-72   | 99%      |
| <a href="#">Mycobacterium frederiksbergense strain DSM 44346 16S ribosomal RNA gene, partial sequence</a> | 268       | 268         | 100%        | 4e-72   | 99%      |
| <a href="#">Mycobacterium smegmatis strain ATCC 19420 16S ribosomal RNA gene, partial sequence</a>        | 268       | 268         | 100%        | 4e-72   | 99%      |

|                                                                                                                            | Max Score | Total Score | Query Cover | E value | Identity |
|----------------------------------------------------------------------------------------------------------------------------|-----------|-------------|-------------|---------|----------|
| <a href="#">Mycobacterium peregrinum strain ATCC 14467 16S ribosomal RNA gene, partial sequence</a>                        | 268       | 268         | 100%        | 4e-72   | 99%      |
| <a href="#">Mycobacterium goodii strain M069 16S ribosomal RNA gene, partial sequence</a>                                  | 265       | 265         | 100%        | 5e-71   | 99%      |
| <a href="#">Mycobacterium smegmatis strain DSM 43756 16S ribosomal RNA gene, partial sequence</a>                          | 265       | 265         | 100%        | 5e-71   | 99%      |
| <a href="#">Mycobacterium canariasense strain 502329 16S ribosomal RNA gene, partial sequence</a>                          | 263       | 263         | 100%        | 2e-70   | 99%      |
| <a href="#">Mycobacterium mageritense strain CIP 104973 16S ribosomal RNA gene, partial sequence</a>                       | 263       | 263         | 100%        | 2e-70   | 99%      |
| <a href="#">Mycobacterium mageritense strain 938 16S ribosomal RNA gene, complete sequence</a>                             | 263       | 263         | 100%        | 2e-70   | 99%      |
| <a href="#">Mycobacterium fortuitum subsp. acetamidolyticum strain NCH E11620 16S ribosomal RNA gene, partial sequence</a> | 291       | 291         | 95%         | 8e-79   | 100%     |
| <a href="#">Mycobacterium setense strain CIP109395 16S ribosomal RNA gene, partial sequence</a>                            | 291       | 291         | 95%         | 8e-79   | 100%     |
| <a href="#">Mycobacterium fortuitum subsp. fortuitum strain CIP 104534 16S ribosomal RNA gene, partial sequence</a>        | 291       | 291         | 95%         | 8e-79   | 100%     |
| <a href="#">Mycobacterium porcinum strain E10241-1 16S ribosomal RNA gene, partial sequence</a>                            | 291       | 291         | 95%         | 8e-79   | 100%     |
| <a href="#">Mycobacterium septicum strain DSM 44393 16S ribosomal RNA gene, partial sequence</a>                           | 291       | 291         | 95%         | 8e-79   | 100%     |
| <a href="#">Mycobacterium peregrinum strain CIP 105382 16S ribosomal RNA gene, partial sequence</a>                        | 291       | 291         | 95%         | 8e-79   | 100%     |
| <a href="#">Mycobacterium neworleansense strain ATCC 49404 16S ribosomal RNA gene, partial sequence</a>                    | 291       | 291         | 95%         | 8e-79   | 100%     |
| <a href="#">Mycobacterium houstonense strain ATCC 49403 16S ribosomal RNA gene, partial sequence</a>                       | 291       | 291         | 95%         | 8e-79   | 100%     |

|                                                                                                                    | Max Score | Total Score | Query Cover | E value | Identity |
|--------------------------------------------------------------------------------------------------------------------|-----------|-------------|-------------|---------|----------|
| <a href="#">Mycobacterium peregrinum strain ATCC 14467 16S ribosomal RNA gene, partial sequence</a>                | 291       | 291         | 95%         | 8e-79   | 100%     |
| <a href="#">Mycobacterium septicum strain W4964 16S ribosomal RNA gene, partial sequence</a>                       | 291       | 291         | 95%         | 8e-79   | 100%     |
| <a href="#">Mycobacterium senegalense strain ATCC 35796 16S ribosomal RNA gene, partial sequence</a>               | 291       | 291         | 95%         | 8e-79   | 100%     |
| <a href="#">Mycobacterium porcinum strain ATCC 33776 16S ribosomal RNA gene, partial sequence</a>                  | 291       | 291         | 95%         | 8e-79   | 100%     |
| <a href="#">Mycobacterium conceptionense strain D16 16S ribosomal RNA gene, partial sequence</a>                   | 291       | 291         | 95%         | 8e-79   | 100%     |
| <a href="#">Mycobacterium houstonense strain Ho1as 16S ribosomal RNA gene, partial sequence</a>                    | 291       | 291         | 95%         | 8e-79   | 100%     |
| <a href="#">Mycobacterium fortuitum subsp. fortuitum strain DSM 46621 16S ribosomal RNA gene, partial sequence</a> | 291       | 291         | 95%         | 8e-79   | 100%     |
| <a href="#">Mycobacterium neworleansense strain W6705 16S ribosomal RNA gene, partial sequence</a>                 | 291       | 291         | 95%         | 8e-79   | 100%     |
| <a href="#">Mycobacterium boenickei strain W5998 16S ribosomal RNA gene, partial sequence</a>                      | 291       | 291         | 95%         | 8e-79   | 100%     |
| <a href="#">Mycobacterium peregrinum strain ATCC 14467 16S ribosomal RNA gene, partial sequence</a>                | 291       | 291         | 95%         | 8e-79   | 100%     |
| <a href="#">Mycobacterium farcinogenes strain ATCC 35753 16S ribosomal RNA gene, partial sequence</a>              | 291       | 291         | 95%         | 8e-79   | 100%     |

SA post dis

Mycobacterium reads extracted

|                                                                                                                                   | Max Score | Total Score | Query Cover | E value | Identity |
|-----------------------------------------------------------------------------------------------------------------------------------|-----------|-------------|-------------|---------|----------|
| <a href="#"><u>Mycobacterium fortuitum subsp. acetamidolyticum strain NCH E11620 16S ribosomal RNA gene, partial sequence</u></a> | 287       | 287         | 98%         | 1e-77   | 99%      |
| <a href="#"><u>Mycobacterium setense strain CIP109395 16S ribosomal RNA gene, partial sequence</u></a>                            | 287       | 287         | 98%         | 1e-77   | 99%      |
| <a href="#"><u>Mycobacterium fortuitum subsp. fortuitum strain CIP 104534 16S ribosomal RNA gene, partial sequence</u></a>        | 287       | 287         | 98%         | 1e-77   | 99%      |
| <a href="#"><u>Mycobacterium porcinum strain E10241-1 16S ribosomal RNA gene, partial sequence</u></a>                            | 287       | 287         | 98%         | 1e-77   | 99%      |
| <a href="#"><u>Mycobacterium septicum strain DSM 44393 16S ribosomal RNA gene, partial sequence</u></a>                           | 287       | 287         | 98%         | 1e-77   | 99%      |
| <a href="#"><u>Mycobacterium peregrinum strain CIP 105382 16S ribosomal RNA gene, partial sequence</u></a>                        | 287       | 287         | 98%         | 1e-77   | 99%      |
| <a href="#"><u>Mycobacterium neworleansense strain ATCC 49404 16S ribosomal RNA gene, partial sequence</u></a>                    | 287       | 287         | 98%         | 1e-77   | 99%      |
| <a href="#"><u>Mycobacterium houstonense strain ATCC 49403 16S ribosomal RNA gene, partial sequence</u></a>                       | 287       | 287         | 98%         | 1e-77   | 99%      |
| <a href="#"><u>Mycobacterium peregrinum strain ATCC 14467 16S ribosomal RNA gene, partial sequence</u></a>                        | 287       | 287         | 98%         | 1e-77   | 99%      |
| <a href="#"><u>Mycobacterium septicum strain W4964 16S ribosomal RNA gene, partial sequence</u></a>                               | 287       | 287         | 98%         | 1e-77   | 99%      |
| <a href="#"><u>Mycobacterium senegalense strain ATCC 35796 16S ribosomal RNA gene, partial sequence</u></a>                       | 287       | 287         | 98%         | 1e-77   | 99%      |
| <a href="#"><u>Mycobacterium porcinum strain ATCC 33776 16S ribosomal RNA gene, partial sequence</u></a>                          | 287       | 287         | 98%         | 1e-77   | 99%      |
| <a href="#"><u>Mycobacterium conceptionense strain D16 16S ribosomal RNA gene, partial sequence</u></a>                           | 287       | 287         | 98%         | 1e-77   | 99%      |

|                                                                                                                           | Max Score | Total Score | Query Cover | E value | Identity |
|---------------------------------------------------------------------------------------------------------------------------|-----------|-------------|-------------|---------|----------|
| <a href="#"><u>Mycobacterium houstonense strain Ho1as 16S ribosomal RNA gene, partial sequence</u></a>                    | 287       | 287         | 98%         | 1e-77   | 99%      |
| <a href="#"><u>Mycobacterium fortuitum subsp. fortuitum strain DSM 46621 16S ribosomal RNA gene, partial sequence</u></a> | 287       | 287         | 98%         | 1e-77   | 99%      |
| <a href="#"><u>Mycobacterium neworleansense strain W6705 16S ribosomal RNA gene, partial sequence</u></a>                 | 287       | 287         | 98%         | 1e-77   | 99%      |
| <a href="#"><u>Mycobacterium boenickei strain W5998 16S ribosomal RNA gene, partial sequence</u></a>                      | 287       | 287         | 98%         | 1e-77   | 99%      |
| <a href="#"><u>Mycobacterium peregrinum strain ATCC 14467 16S ribosomal RNA gene, partial sequence</u></a>                | 287       | 287         | 98%         | 1e-77   | 99%      |
| <a href="#"><u>Mycobacterium farcinogenes strain ATCC 35753 16S ribosomal RNA gene, partial sequence</u></a>              | 287       | 287         | 98%         | 1e-77   | 99%      |
| <a href="#"><u>Mycobacterium alvei strain CR-21 16S ribosomal RNA gene, partial sequence</u></a>                          | 287       | 287         | 98%         | 1e-77   | 99%      |
| <a href="#"><u>Mycobacterium fortuitum subsp. fortuitum strain ATCC 6841 16S ribosomal RNA gene, partial sequence</u></a> | 283       | 283         | 95%         | 1e-76   | 99%      |

SA 1 CT

Mycobacterium reads extracted

|                                                                                                          | Max Score | Total Score | Query Cover | E value | Identity |
|----------------------------------------------------------------------------------------------------------|-----------|-------------|-------------|---------|----------|
| <a href="#">Mycobacterium gordonae strain ATCC 14470 16S ribosomal RNA gene, partial sequence</a>        | 318       | 318         | 99%         | 4e-87   | 99%      |
| <a href="#">Mycobacterium gordonae strain DSM 44160 16S ribosomal RNA gene, partial sequence</a>         | 318       | 318         | 99%         | 4e-87   | 99%      |
| <a href="#">Mycobacterium gordonae strain ATCC 14470 16S ribosomal RNA gene, complete sequence</a>       | 315       | 315         | 99%         | 5e-86   | 99%      |
| <a href="#">Mycobacterium shinjukuense strain GTC 2738 16S ribosomal RNA gene, partial sequence</a>      | 313       | 313         | 99%         | 2e-85   | 99%      |
| <a href="#">Mycobacterium paragordoniae strain 49061 16S ribosomal RNA gene, partial sequence</a>        | 302       | 302         | 99%         | 4e-82   | 98%      |
| <a href="#">Mycobacterium szulgai strain ATCC 35799 16S ribosomal RNA gene, partial sequence</a>         | 302       | 302         | 99%         | 4e-82   | 98%      |
| <a href="#">Mycobacterium avium 104 strain 104 16S ribosomal RNA, complete sequence</a>                  | 302       | 302         | 99%         | 4e-82   | 98%      |
| <a href="#">Mycobacterium intracellulare MOTT-02 strain MOTT-02 16S ribosomal RNA, complete sequence</a> | 302       | 302         | 99%         | 4e-82   | 98%      |
| <a href="#">Mycobacterium timonense strain 5351974 16S ribosomal RNA gene, partial sequence</a>          | 302       | 302         | 99%         | 4e-82   | 98%      |
| <a href="#">Mycobacterium colombiense strain 10B 16S ribosomal RNA gene, partial sequence</a>            | 302       | 302         | 99%         | 4e-82   | 98%      |
| <a href="#">Mycobacterium intracellulare strain ATCC 13950 16S ribosomal RNA gene, partial sequence</a>  | 302       | 302         | 99%         | 4e-82   | 98%      |
| <a href="#">Mycobacterium conspicuum strain 3895/92 16S ribosomal RNA gene, partial sequence</a>         | 302       | 302         | 99%         | 4e-82   | 98%      |
| <a href="#">Mycobacterium malmoeense strain ATCC 29571 16S ribosomal RNA gene, partial sequence</a>      | 302       | 302         | 99%         | 4e-82   | 98%      |
| <a href="#">Mycobacterium nebraskense strain ATCC BAA-837 16S ribosomal RNA gene, partial sequence</a>   | 302       | 302         | 99%         | 4e-82   | 98%      |

|                                                                                                                       | Max Score | Total Score | Query Cover | E value | Identity |
|-----------------------------------------------------------------------------------------------------------------------|-----------|-------------|-------------|---------|----------|
| <a href="#"><u><b>Mycobacterium intracellulare strain ATCC 13950 16S ribosomal RNA gene, partial sequence</b></u></a> | 302       | 302         | 99%         | 4e-82   | 98%      |
| <a href="#"><u><b>Mycobacterium colombiense strain CIP 108962 16S ribosomal RNA gene, partial sequence</b></u></a>    | 302       | 302         | 99%         | 4e-82   | 98%      |
| <a href="#"><u><b>Mycobacterium arosiense strain ATCC BAA-1401 16S ribosomal RNA gene, partial sequence</b></u></a>   | 302       | 302         | 99%         | 4e-82   | 98%      |
| <a href="#"><u><b>Mycobacterium avium strain ATCC 25291 16S ribosomal RNA gene, partial sequence</b></u></a>          | 302       | 302         | 99%         | 4e-82   | 98%      |
| <a href="#"><u><b>Mycobacterium bouchedurhonense strain 4355387 16S ribosomal RNA gene, partial sequence</b></u></a>  | 302       | 302         | 99%         | 4e-82   | 98%      |
